# Supplementary material
Source: publisher figshare collection journal article supplement (https://acs.figshare.com/ndownloader/files/4597738)
Supplement: Supplementary file 1 [file 4597738]

  
data_dk16 
  
_audit_creation_method            SHELXL-97 
_chemical_name_systematic 
; 
 ? 
; 
_chemical_name_common             ? 
_chemical_melting_point           ? 
_chemical_formula_moiety          
 'C28 H62 Cl3 Mo O3 Si2'  
_chemical_formula_sum 
 'C28 H62 Cl3 Mo O3 Si2' 
_chemical_formula_weight          705.25 
  
loop_ 
 _atom_type_symbol 
 _atom_type_description 
 _atom_type_scat_dispersion_real 
 _atom_type_scat_dispersion_imag 
 _atom_type_scat_source 
 'C'  'C'   0.0033   0.0016 
 'International Tables Vol C Tables 4.2.6.8 and 6.1.1.4' 
 'H'  'H'   0.0000   0.0000 
 'International Tables Vol C Tables 4.2.6.8 and 6.1.1.4' 
 'Cl'  'Cl'   0.1484   0.1585 
 'International Tables Vol C Tables 4.2.6.8 and 6.1.1.4' 
 'Mo'  'Mo'  -1.6832   0.6857 
 'International Tables Vol C Tables 4.2.6.8 and 6.1.1.4' 
 'O'  'O'   0.0106   0.0060 
 'International Tables Vol C Tables 4.2.6.8 and 6.1.1.4' 
 'Si'  'Si'   0.0817   0.0704 
 'International Tables Vol C Tables 4.2.6.8 and 6.1.1.4' 
  
_symmetry_cell_setting            Monoclinic 
_symmetry_space_group_name_H-M    C2/c 
  
loop_ 
 _symmetry_equiv_pos_as_xyz 
 'x, y, z' 
 '-x, y, -z+1/2' 
 'x+1/2, y+1/2, z' 
 '-x+1/2, y+1/2, -z+1/2' 
 '-x, -y, -z' 
 'x, -y, z-1/2' 
 '-x+1/2, -y+1/2, -z' 
 'x+1/2, -y+1/2, z-1/2' 
  
_cell_length_a                    8.7262(8) 
_cell_length_b                    15.4639(17) 
_cell_length_c                    27.145(2) 
_cell_angle_alpha                 90.00 
_cell_angle_beta                  96.374(3) 
_cell_angle_gamma                 90.00 
_cell_volume                      3640.3(6) 
_cell_formula_units_Z             4 
_cell_measurement_temperature     133(2) 
_cell_measurement_reflns_used     2877 
_cell_measurement_theta_min       2.63 
_cell_measurement_theta_max       26.62 
  
_exptl_crystal_description        block 
_exptl_crystal_colour             yellow 
_exptl_crystal_size_max           0.60 
_exptl_crystal_size_mid           0.35 
_exptl_crystal_size_min           0.15 
_exptl_crystal_density_meas       ? 
_exptl_crystal_density_diffrn     1.287 
_exptl_crystal_density_method     'not measured' 
_exptl_crystal_F_000              1500 
_exptl_absorpt_coefficient_mu     0.672 
_exptl_absorpt_correction_type    multi-scan 
_exptl_absorpt_correction_T_min   0.6887 
_exptl_absorpt_correction_T_max   0.9060 
_exptl_absorpt_process_details    SADABS 
  
_exptl_special_details 
; 
 ? 
; 
  
_diffrn_ambient_temperature       133(2) 
_diffrn_radiation_wavelength      0.71073 
_diffrn_radiation_type            MoK\a 
_diffrn_radiation_source          'fine-focus sealed tube' 
_diffrn_radiation_monochromator   graphite 
_diffrn_measurement_device_type   'Bruker X8 APEX II diffractometer' 
_diffrn_measurement_method        'phi and omega scans' 
_diffrn_detector_area_resol_mean  ? 
_diffrn_standards_number          ? 
_diffrn_standards_interval_count  ? 
_diffrn_standards_interval_time   ? 
_diffrn_standards_decay_%         ? 
_diffrn_reflns_number             14811 
_diffrn_reflns_av_R_equivalents   0.0406 
_diffrn_reflns_av_sigmaI/netI     0.0524 
_diffrn_reflns_limit_h_min        -11 
_diffrn_reflns_limit_h_max        11 
_diffrn_reflns_limit_k_min        -18 
_diffrn_reflns_limit_k_max        20 
_diffrn_reflns_limit_l_min        -32 
_diffrn_reflns_limit_l_max        36 
_diffrn_reflns_theta_min          1.51 
_diffrn_reflns_theta_max          28.32 
_reflns_number_total              4409 
_reflns_number_gt                 3302 
_reflns_threshold_expression      >2sigma(I) 
  
_computing_data_collection        'Bruker APEX2' 
_computing_cell_refinement        'Bruker SAINT+' 
_computing_data_reduction         'Bruker SAINT+' 
_computing_structure_solution     'SHELXS-97 (Sheldrick, 1990)' 
_computing_structure_refinement   'SHELXL-97 (Sheldrick, 1997)' 
_computing_molecular_graphics     'Bruker SHELXTL' 
_computing_publication_material   'Bruker SHELXTL' 
  
_refine_special_details 
; 
 Refinement of F^2^ against ALL reflections.  The weighted R-factor wR and 
 goodness of fit S are based on F^2^, conventional R-factors R are based 
 on F, with F set to zero for negative F^2^. The threshold expression of 
 F^2^ > 2sigma(F^2^) is used only for calculating R-factors(gt) etc. and is 
 not relevant to the choice of reflections for refinement.  R-factors based 
 on F^2^ are statistically about twice as large as those based on F, and R- 
 factors based on ALL data will be even larger. 
; 
  
_refine_ls_structure_factor_coef  Fsqd 
_refine_ls_matrix_type            full 
_refine_ls_weighting_scheme       calc 
_refine_ls_weighting_details 
 'calc w=1/[\s^2^(Fo^2^)+(0.0399P)^2^+0.2684P] where P=(Fo^2^+2Fc^2^)/3' 
_atom_sites_solution_primary      direct 
_atom_sites_solution_secondary    difmap 
_atom_sites_solution_hydrogens    geom 
_refine_ls_hydrogen_treatment     riding
_refine_ls_extinction_method      none 
_refine_ls_extinction_coef        ? 
_refine_ls_number_reflns          4409 
_refine_ls_number_parameters      178 
_refine_ls_number_restraints      0 
_refine_ls_R_factor_all           0.0516 
_refine_ls_R_factor_gt            0.0340 
_refine_ls_wR_factor_ref          0.0876 
_refine_ls_wR_factor_gt           0.0841 
_refine_ls_goodness_of_fit_ref    1.102 
_refine_ls_restrained_S_all       1.102 
_refine_ls_shift/su_max           0.002 
_refine_ls_shift/su_mean          0.000 
  
loop_ 
 _atom_site_label 
 _atom_site_type_symbol 
 _atom_site_fract_x 
 _atom_site_fract_y 
 _atom_site_fract_z 
 _atom_site_U_iso_or_equiv 
 _atom_site_adp_type 
 _atom_site_occupancy 
 _atom_site_symmetry_multiplicity 
 _atom_site_calc_flag 
 _atom_site_refinement_flags 
 _atom_site_disorder_assembly 
 _atom_site_disorder_group 
Mo1 Mo 0.5000 0.300859(15) 0.2500 0.01361(6) Uani 1 2 d S . . 
Cl1 Cl 0.76914(5) 0.29132(3) 0.273503(17) 0.01790(11) Uani 1 1 d . . . 
Cl2 Cl 0.5000 0.45236(4) 0.2500 0.02180(16) Uani 1 2 d S . . 
Si1 Si 0.54000(6) 0.31447(3) 0.122154(19) 0.01487(12) Uani 1 1 d . . . 
O1 O 0.52950(13) 0.30146(8) 0.18412(4) 0.0143(3) Uani 1 1 d . . . 
O2 O 0.5000 0.16069(11) 0.2500 0.0132(4) Uani 1 2 d S . . 
C1 C 0.4393(2) 0.42128(13) 0.10166(7) 0.0228(5) Uani 1 1 d . . . 
C2 C 0.5388(2) 0.50117(14) 0.11702(8) 0.0320(6) Uani 1 1 d . . . 
H2A H 0.4806 0.5538 0.1073 0.048 Uiso 1 1 calc R . . 
H2B H 0.6331 0.4997 0.1005 0.048 Uiso 1 1 calc R . . 
H2C H 0.5662 0.5009 0.1530 0.048 Uiso 1 1 calc R . . 
C3 C 0.2868(2) 0.43299(14) 0.12499(8) 0.0295(5) Uani 1 1 d . . . 
H3A H 0.2366 0.4867 0.1127 0.044 Uiso 1 1 calc R . . 
H3B H 0.3088 0.4358 0.1611 0.044 Uiso 1 1 calc R . . 
H3C H 0.2184 0.3839 0.1159 0.044 Uiso 1 1 calc R . . 
C4 C 0.4014(2) 0.42349(15) 0.04471(8) 0.0338(6) Uani 1 1 d . . . 
H4A H 0.3309 0.3760 0.0342 0.051 Uiso 1 1 calc R . . 
H4B H 0.4967 0.4171 0.0291 0.051 Uiso 1 1 calc R . . 
H4C H 0.3526 0.4788 0.0348 0.051 Uiso 1 1 calc R . . 
C5 C 0.4348(2) 0.21518(13) 0.09210(7) 0.0197(5) Uani 1 1 d . . . 
C6 C 0.2588(2) 0.22395(15) 0.08907(8) 0.0279(5) Uani 1 1 d . . . 
H6A H 0.2104 0.1703 0.0760 0.042 Uiso 1 1 calc R . . 
H6B H 0.2248 0.2721 0.0671 0.042 Uiso 1 1 calc R . . 
H6C H 0.2289 0.2350 0.1222 0.042 Uiso 1 1 calc R . . 
C7 C 0.4790(2) 0.19805(14) 0.03932(7) 0.0293(5) Uani 1 1 d . . . 
H7A H 0.5892 0.1845 0.0412 0.044 Uiso 1 1 calc R . . 
H7B H 0.4569 0.2497 0.0188 0.044 Uiso 1 1 calc R . . 
H7C H 0.4189 0.1492 0.0246 0.044 Uiso 1 1 calc R . . 
C8 C 0.4745(2) 0.13417(13) 0.12339(7) 0.0234(5) Uani 1 1 d . . . 
H8A H 0.4371 0.1410 0.1559 0.035 Uiso 1 1 calc R . . 
H8B H 0.5865 0.1260 0.1277 0.035 Uiso 1 1 calc R . . 
H8C H 0.4252 0.0836 0.1066 0.035 Uiso 1 1 calc R . . 
C9 C 0.7561(2) 0.31569(12) 0.11525(7) 0.0189(5) Uani 1 1 d . . . 
C10 C 0.7901(2) 0.34531(15) 0.06349(7) 0.0294(5) Uani 1 1 d . . . 
H10A H 0.9013 0.3425 0.0614 0.044 Uiso 1 1 calc R . . 
H10B H 0.7542 0.4049 0.0578 0.044 Uiso 1 1 calc R . . 
H10C H 0.7363 0.3074 0.0383 0.044 Uiso 1 1 calc R . . 
C11 C 0.8291(2) 0.22658(14) 0.12523(8) 0.0285(5) Uani 1 1 d . . . 
H11A H 0.7820 0.1852 0.1007 0.043 Uiso 1 1 calc R . . 
H11B H 0.8118 0.2074 0.1586 0.043 Uiso 1 1 calc R . . 
H11C H 0.9401 0.2301 0.1228 0.043 Uiso 1 1 calc R . . 
C12 C 0.8424(2) 0.37724(13) 0.15363(7) 0.0243(5) Uani 1 1 d . . . 
H12A H 0.8268 0.3582 0.1871 0.036 Uiso 1 1 calc R . . 
H12B H 0.8022 0.4361 0.1483 0.036 Uiso 1 1 calc R . . 
H12C H 0.9527 0.3766 0.1498 0.036 Uiso 1 1 calc R . . 
C13 C 0.3641(2) 0.10558(12) 0.25414(7) 0.0185(4) Uani 1 1 d . . . 
H13B H 0.2935 0.1066 0.2230 0.022 Uiso 1 1 calc R . . 
H13A H 0.3072 0.1252 0.2817 0.022 Uiso 1 1 calc R . . 
C14 C 0.4296(2) 0.01607(12) 0.26417(7) 0.0205(5) Uani 1 1 d . . . 
H14B H 0.3549 -0.0291 0.2515 0.025 Uiso 1 1 calc R . . 
H14A H 0.4590 0.0068 0.3001 0.025 Uiso 1 1 calc R . . 
  
loop_ 
 _atom_site_aniso_label 
 _atom_site_aniso_U_11 
 _atom_site_aniso_U_22 
 _atom_site_aniso_U_33 
 _atom_site_aniso_U_23 
 _atom_site_aniso_U_13 
 _atom_site_aniso_U_12 
Mo1 0.01364(11) 0.01261(11) 0.01497(12) 0.000 0.00333(9) 0.000 
Cl1 0.0136(2) 0.0195(2) 0.0206(2) -0.00148(18) 0.00189(18) -0.00164(17) 
Cl2 0.0260(3) 0.0120(3) 0.0282(4) 0.000 0.0067(3) 0.000 
Si1 0.0127(2) 0.0179(3) 0.0143(3) 0.0012(2) 0.0027(2) -0.0001(2) 
O1 0.0144(6) 0.0123(6) 0.0166(7) 0.0009(5) 0.0034(5) 0.0000(5) 
O2 0.0110(8) 0.0094(9) 0.0188(10) 0.000 0.0005(7) 0.000 
C1 0.0216(10) 0.0216(11) 0.0259(11) 0.0076(9) 0.0065(9) 0.0026(8) 
C2 0.0346(12) 0.0187(11) 0.0446(14) 0.0067(10) 0.0126(11) 0.0045(9) 
C3 0.0246(10) 0.0305(12) 0.0342(12) 0.0108(10) 0.0070(10) 0.0110(9) 
C4 0.0324(12) 0.0418(14) 0.0274(12) 0.0173(11) 0.0038(10) 0.0058(10) 
C5 0.0181(9) 0.0250(11) 0.0162(10) 0.0003(8) 0.0024(8) -0.0044(8) 
C6 0.0188(10) 0.0361(13) 0.0275(12) 0.0056(10) -0.0024(9) -0.0067(9) 
C7 0.0302(11) 0.0380(13) 0.0190(11) -0.0044(10) 0.0001(9) -0.0116(10) 
C8 0.0247(10) 0.0217(11) 0.0236(11) -0.0036(9) 0.0018(9) -0.0051(9) 
C9 0.0156(9) 0.0213(10) 0.0209(10) -0.0012(8) 0.0067(8) -0.0028(8) 
C10 0.0219(10) 0.0429(14) 0.0247(12) -0.0009(10) 0.0076(9) -0.0074(10) 
C11 0.0143(9) 0.0298(12) 0.0425(14) -0.0040(10) 0.0073(9) 0.0036(8) 
C12 0.0173(9) 0.0312(12) 0.0249(11) -0.0017(9) 0.0051(9) -0.0071(9) 
C13 0.0154(9) 0.0153(10) 0.0254(10) -0.0002(8) 0.0046(8) -0.0046(7) 
C14 0.0236(10) 0.0135(9) 0.0244(11) 0.0015(8) 0.0024(9) -0.0032(8) 
  
_geom_special_details 
; 
 All esds (except the esd in the dihedral angle between two l.s. planes) 
 are estimated using the full covariance matrix.  The cell esds are taken 
 into account individually in the estimation of esds in distances, angles 
 and torsion angles; correlations between esds in cell parameters are only 
 used when they are defined by crystal symmetry.  An approximate (isotropic) 
 treatment of cell esds is used for estimating esds involving l.s. planes. 
; 
  
loop_ 
 _geom_bond_atom_site_label_1 
 _geom_bond_atom_site_label_2 
 _geom_bond_distance 
 _geom_bond_site_symmetry_2 
 _geom_bond_publ_flag 
Mo1 O1 1.8348(12) 2_655 ? 
Mo1 O1 1.8348(12) . ? 
Mo1 O2 2.1676(17) . ? 
Mo1 Cl2 2.3429(7) . ? 
Mo1 Cl1 2.3689(5) . ? 
Mo1 Cl1 2.3690(5) 2_655 ? 
Si1 O1 1.7066(13) . ? 
Si1 C9 1.9160(19) . ? 
Si1 C5 1.923(2) . ? 
Si1 C1 1.924(2) . ? 
O2 C13 1.474(2) 2_655 ? 
O2 C13 1.475(2) . ? 
C1 C2 1.541(3) . ? 
C1 C4 1.545(3) . ? 
C1 C3 1.546(3) . ? 
C5 C8 1.532(3) . ? 
C5 C6 1.535(3) . ? 
C5 C7 1.548(3) . ? 
C9 C11 1.529(3) . ? 
C9 C10 1.538(3) . ? 
C9 C12 1.544(3) . ? 
C13 C14 1.511(3) . ? 
C14 C14 1.521(4) 2_655 ? 
  
loop_ 
 _geom_angle_atom_site_label_1 
 _geom_angle_atom_site_label_2 
 _geom_angle_atom_site_label_3 
 _geom_angle 
 _geom_angle_site_symmetry_1 
 _geom_angle_site_symmetry_3 
 _geom_angle_publ_flag 
O1 Mo1 O1 179.42(8) 2_655 . ? 
O1 Mo1 O2 90.29(4) 2_655 . ? 
O1 Mo1 O2 90.29(4) . . ? 
O1 Mo1 Cl2 89.71(4) 2_655 . ? 
O1 Mo1 Cl2 89.71(4) . . ? 
O2 Mo1 Cl2 180.0 . . ? 
O1 Mo1 Cl1 88.86(4) 2_655 . ? 
O1 Mo1 Cl1 91.18(4) . . ? 
O2 Mo1 Cl1 86.429(12) . . ? 
Cl2 Mo1 Cl1 93.571(12) . . ? 
O1 Mo1 Cl1 91.18(4) 2_655 2_655 ? 
O1 Mo1 Cl1 88.85(4) . 2_655 ? 
O2 Mo1 Cl1 86.431(12) . 2_655 ? 
Cl2 Mo1 Cl1 93.569(12) . 2_655 ? 
Cl1 Mo1 Cl1 172.86(2) . 2_655 ? 
O1 Si1 C9 104.99(7) . . ? 
O1 Si1 C5 104.40(7) . . ? 
C9 Si1 C5 113.27(8) . . ? 
O1 Si1 C1 108.26(8) . . ? 
C9 Si1 C1 112.72(8) . . ? 
C5 Si1 C1 112.43(9) . . ? 
Si1 O1 Mo1 171.86(8) . . ? 
C13 O2 C13 109.39(18) 2_655 . ? 
C13 O2 Mo1 125.31(9) 2_655 . ? 
C13 O2 Mo1 125.31(9) . . ? 
C2 C1 C4 107.73(17) . . ? 
C2 C1 C3 106.27(17) . . ? 
C4 C1 C3 107.99(16) . . ? 
C2 C1 Si1 112.62(14) . . ? 
C4 C1 Si1 110.39(14) . . ? 
C3 C1 Si1 111.61(13) . . ? 
C8 C5 C6 105.39(16) . . ? 
C8 C5 C7 108.01(16) . . ? 
C6 C5 C7 108.44(16) . . ? 
C8 C5 Si1 110.48(13) . . ? 
C6 C5 Si1 112.32(14) . . ? 
C7 C5 Si1 111.91(13) . . ? 
C11 C9 C10 108.17(17) . . ? 
C11 C9 C12 105.90(16) . . ? 
C10 C9 C12 107.70(16) . . ? 
C11 C9 Si1 111.63(13) . . ? 
C10 C9 Si1 112.57(13) . . ? 
C12 C9 Si1 110.57(13) . . ? 
O2 C13 C14 104.61(14) . . ? 
C13 C14 C14 102.67(12) . 2_655 ? 
  
_diffrn_measured_fraction_theta_max    0.972 
_diffrn_reflns_theta_full              28.32 
_diffrn_measured_fraction_theta_full   0.972 
_refine_diff_density_max    0.468 
_refine_diff_density_min   -0.697 
_refine_diff_density_rms    0.082 

#===end

data_dk17 
  
_audit_creation_method            SHELXL-97 
_chemical_name_systematic 
; 
 ? 
; 
_chemical_name_common             ? 
_chemical_melting_point           ? 
_chemical_formula_moiety          
 'C27 H63 Cl2 Mo O2 P Si2' 
_chemical_formula_sum 
 'C27 H63 Cl2 Mo O2 P Si2' 
_chemical_formula_weight          673.76 
  
loop_ 
 _atom_type_symbol 
 _atom_type_description 
 _atom_type_scat_dispersion_real 
 _atom_type_scat_dispersion_imag 
 _atom_type_scat_source 
 'C'  'C'   0.0033   0.0016 
 'International Tables Vol C Tables 4.2.6.8 and 6.1.1.4' 
 'H'  'H'   0.0000   0.0000 
 'International Tables Vol C Tables 4.2.6.8 and 6.1.1.4' 
 'O'  'O'   0.0106   0.0060 
 'International Tables Vol C Tables 4.2.6.8 and 6.1.1.4' 
 'Cl'  'Cl'   0.1484   0.1585 
 'International Tables Vol C Tables 4.2.6.8 and 6.1.1.4' 
 'Mo'  'Mo'  -1.6832   0.6857 
 'International Tables Vol C Tables 4.2.6.8 and 6.1.1.4' 
 'Si'  'Si'   0.0817   0.0704 
 'International Tables Vol C Tables 4.2.6.8 and 6.1.1.4' 
 'P'  'P'   0.1023   0.0942 
 'International Tables Vol C Tables 4.2.6.8 and 6.1.1.4' 
  
_symmetry_cell_setting            Monoclinic 
_symmetry_space_group_name_H-M    P2(1)/n 
  
loop_ 
 _symmetry_equiv_pos_as_xyz 
 'x, y, z' 
 '-x+1/2, y+1/2, -z+1/2' 
 '-x, -y, -z' 
 'x-1/2, -y-1/2, z-1/2' 
  
_cell_length_a                    8.5082(6) 
_cell_length_b                    15.5481(10) 
_cell_length_c                    26.5089(17) 
_cell_angle_alpha                 90.00 
_cell_angle_beta                  97.070(3) 
_cell_angle_gamma                 90.00 
_cell_volume                      3480.1(4) 
_cell_formula_units_Z             4 
_cell_measurement_temperature     133(2) 
_cell_measurement_reflns_used     6363 
_cell_measurement_theta_min       2.44 
_cell_measurement_theta_max       31.08 
  
_exptl_crystal_description        ? 
_exptl_crystal_colour             ? 
_exptl_crystal_size_max           0.50 
_exptl_crystal_size_mid           0.40 
_exptl_crystal_size_min           0.30 
_exptl_crystal_density_meas       ? 
_exptl_crystal_density_diffrn     1.286 
_exptl_crystal_density_method     'not measured' 
_exptl_crystal_F_000              1440 
_exptl_absorpt_coefficient_mu     0.667 
_exptl_absorpt_correction_type    multi-scan 
_exptl_absorpt_correction_T_min   0.7316 
_exptl_absorpt_correction_T_max   0.8250 
_exptl_absorpt_process_details    SADABS 
  
_exptl_special_details 
; 
 ? 
; 
  
_diffrn_ambient_temperature       133(2) 
_diffrn_radiation_wavelength      0.71073 
_diffrn_radiation_type            MoK\a 
_diffrn_radiation_source          'fine-focus sealed tube' 
_diffrn_radiation_monochromator   graphite 
_diffrn_measurement_device_type   'Bruker X8 APEX II diffractometer' 
_diffrn_measurement_method        'phi and omega scans' 
_diffrn_detector_area_resol_mean  ? 
_diffrn_standards_number          ? 
_diffrn_standards_interval_count  ? 
_diffrn_standards_interval_time   ? 
_diffrn_standards_decay_%         ? 
_diffrn_reflns_number             29927 
_diffrn_reflns_av_R_equivalents   0.0252 
_diffrn_reflns_av_sigmaI/netI     0.0294 
_diffrn_reflns_limit_h_min        -11 
_diffrn_reflns_limit_h_max        7 
_diffrn_reflns_limit_k_min        -20 
_diffrn_reflns_limit_k_max        18 
_diffrn_reflns_limit_l_min        -29 
_diffrn_reflns_limit_l_max        35 
_diffrn_reflns_theta_min          1.52 
_diffrn_reflns_theta_max          28.28 
_reflns_number_total              8586 
_reflns_number_gt                 7143 
_reflns_threshold_expression      >2sigma(I) 
  
_computing_data_collection        'Bruker APEX2' 
_computing_cell_refinement        'Bruker SAINT+' 
_computing_data_reduction         'Bruker SAINT+' 
_computing_structure_solution     'SHELXS-97 (Sheldrick, 1990)' 
_computing_structure_refinement   'SHELXL-97 (Sheldrick, 1997)' 
_computing_molecular_graphics     'Bruker SHELXTL' 
_computing_publication_material   'Bruker SHELXTL' 
  
_refine_special_details 
; 
 Refinement of F^2^ against ALL reflections.  The weighted R-factor wR and 
 goodness of fit S are based on F^2^, conventional R-factors R are based 
 on F, with F set to zero for negative F^2^. The threshold expression of 
 F^2^ > 2sigma(F^2^) is used only for calculating R-factors(gt) etc. and is 
 not relevant to the choice of reflections for refinement.  R-factors based 
 on F^2^ are statistically about twice as large as those based on F, and R- 
 factors based on ALL data will be even larger. 
; 
  
_refine_ls_structure_factor_coef  Fsqd 
_refine_ls_matrix_type            full 
_refine_ls_weighting_scheme       calc 
_refine_ls_weighting_details 
 'calc w=1/[\s^2^(Fo^2^)+(0.0316P)^2^+0.6198P] where P=(Fo^2^+2Fc^2^)/3' 
_atom_sites_solution_primary      direct 
_atom_sites_solution_secondary    difmap 
_atom_sites_solution_hydrogens    geom 
_refine_ls_hydrogen_treatment     riding 
_refine_ls_extinction_method      none 
_refine_ls_extinction_coef        ? 
_refine_ls_number_reflns          8586 
_refine_ls_number_parameters      337 
_refine_ls_number_restraints      0 
_refine_ls_R_factor_all           0.0320 
_refine_ls_R_factor_gt            0.0246 
_refine_ls_wR_factor_ref          0.0662 
_refine_ls_wR_factor_gt           0.0647 
_refine_ls_goodness_of_fit_ref    1.124 
_refine_ls_restrained_S_all       1.124 
_refine_ls_shift/su_max           0.051 
_refine_ls_shift/su_mean          0.001 
  
loop_ 
 _atom_site_label 
 _atom_site_type_symbol 
 _atom_site_fract_x 
 _atom_site_fract_y 
 _atom_site_fract_z 
 _atom_site_U_iso_or_equiv 
 _atom_site_adp_type 
 _atom_site_occupancy 
 _atom_site_symmetry_multiplicity 
 _atom_site_calc_flag 
 _atom_site_refinement_flags 
 _atom_site_disorder_assembly 
 _atom_site_disorder_group 
Mo1 Mo 0.797783(11) 0.361031(6) 0.139325(3) 0.01196(2) Uani 1 1 d . . . 
Cl1 Cl 0.59634(4) 0.25733(2) 0.155247(10) 0.02282(7) Uani 1 1 d . . . 
Cl2 Cl 1.01044(3) 0.459611(19) 0.124105(10) 0.01959(7) Uani 1 1 d . . . 
P1 P 0.59593(4) 0.46628(2) 0.116985(11) 0.01627(7) Uani 1 1 d . . . 
Si1 Si 0.93155(4) 0.38399(2) 0.268392(11) 0.01312(7) Uani 1 1 d . . . 
Si2 Si 0.86436(4) 0.23685(2) 0.035506(11) 0.01225(7) Uani 1 1 d . . . 
O1 O 0.84265(9) 0.38120(5) 0.20766(3) 0.01440(18) Uani 1 1 d . . . 
O2 O 0.80964(9) 0.30874(5) 0.07782(3) 0.01423(18) Uani 1 1 d . . . 
C1 C 0.76492(14) 0.36653(8) 0.31033(4) 0.0218(3) Uani 1 1 d . . . 
C2 C 0.65114(16) 0.29507(10) 0.28882(5) 0.0353(4) Uani 1 1 d . . . 
H2A H 0.5670 0.2881 0.3106 0.053 Uiso 1 1 calc R . . 
H2B H 0.7096 0.2409 0.2877 0.053 Uiso 1 1 calc R . . 
H2C H 0.6043 0.3106 0.2544 0.053 Uiso 1 1 calc R . . 
C3 C 0.66293(16) 0.44739(10) 0.31328(5) 0.0342(4) Uani 1 1 d . . . 
H3A H 0.5784 0.4355 0.3343 0.051 Uiso 1 1 calc R . . 
H3B H 0.6161 0.4637 0.2790 0.051 Uiso 1 1 calc R . . 
H3C H 0.7292 0.4945 0.3284 0.051 Uiso 1 1 calc R . . 
C4 C 0.83075(16) 0.34177(10) 0.36515(4) 0.0302(3) Uani 1 1 d . . . 
H4A H 0.9075 0.3852 0.3792 0.045 Uiso 1 1 calc R . . 
H4B H 0.8830 0.2856 0.3651 0.045 Uiso 1 1 calc R . . 
H4C H 0.7436 0.3388 0.3861 0.045 Uiso 1 1 calc R . . 
C5 C 1.02702(15) 0.49508(8) 0.27824(4) 0.0198(3) Uani 1 1 d . . . 
C6 C 0.91785(17) 0.56408(9) 0.25096(5) 0.0310(3) Uani 1 1 d . . . 
H6A H 0.9657 0.6210 0.2574 0.047 Uiso 1 1 calc R . . 
H6B H 0.8147 0.5625 0.2638 0.047 Uiso 1 1 calc R . . 
H6C H 0.9036 0.5527 0.2143 0.047 Uiso 1 1 calc R . . 
C7 C 1.06190(17) 0.51840(9) 0.33501(5) 0.0288(3) Uani 1 1 d . . . 
H7A H 1.1351 0.4761 0.3523 0.043 Uiso 1 1 calc R . . 
H7B H 0.9629 0.5182 0.3504 0.043 Uiso 1 1 calc R . . 
H7C H 1.1099 0.5757 0.3385 0.043 Uiso 1 1 calc R . . 
C8 C 1.18498(15) 0.50250(9) 0.25585(5) 0.0288(3) Uani 1 1 d . . . 
H8A H 1.2224 0.5621 0.2586 0.043 Uiso 1 1 calc R . . 
H8B H 1.1694 0.4853 0.2200 0.043 Uiso 1 1 calc R . . 
H8C H 1.2638 0.4648 0.2747 0.043 Uiso 1 1 calc R . . 
C9 C 1.08116(15) 0.29159(8) 0.27166(4) 0.0207(3) Uani 1 1 d . . . 
C10 C 0.99421(18) 0.20459(9) 0.26721(5) 0.0346(4) Uani 1 1 d . . . 
H10A H 1.0706 0.1584 0.2640 0.052 Uiso 1 1 calc R . . 
H10B H 0.9147 0.2050 0.2371 0.052 Uiso 1 1 calc R . . 
H10C H 0.9419 0.1950 0.2977 0.052 Uiso 1 1 calc R . . 
C11 C 1.19461(17) 0.29141(10) 0.32158(5) 0.0353(4) Uani 1 1 d . . . 
H11A H 1.2655 0.2417 0.3221 0.053 Uiso 1 1 calc R . . 
H11B H 1.1332 0.2880 0.3505 0.053 Uiso 1 1 calc R . . 
H11C H 1.2574 0.3444 0.3240 0.053 Uiso 1 1 calc R . . 
C12 C 1.18242(15) 0.29631(9) 0.22750(5) 0.0260(3) Uani 1 1 d . . . 
H12A H 1.2572 0.3443 0.2332 0.039 Uiso 1 1 calc R . . 
H12B H 1.1134 0.3053 0.1955 0.039 Uiso 1 1 calc R . . 
H12C H 1.2411 0.2424 0.2257 0.039 Uiso 1 1 calc R . . 
C13 C 1.04169(14) 0.17952(8) 0.07225(4) 0.0190(3) Uani 1 1 d . . . 
C14 C 1.09340(17) 0.09928(9) 0.04488(5) 0.0335(4) Uani 1 1 d . . . 
H14A H 1.1200 0.1155 0.0112 0.050 Uiso 1 1 calc R . . 
H14B H 1.0068 0.0573 0.0411 0.050 Uiso 1 1 calc R . . 
H14C H 1.1865 0.0738 0.0648 0.050 Uiso 1 1 calc R . . 
C15 C 1.00316(17) 0.15249(9) 0.12526(5) 0.0305(4) Uani 1 1 d . . . 
H15A H 1.1001 0.1329 0.1458 0.046 Uiso 1 1 calc R . . 
H15B H 0.9255 0.1057 0.1218 0.046 Uiso 1 1 calc R . . 
H15C H 0.9594 0.2017 0.1419 0.046 Uiso 1 1 calc R . . 
C16 C 1.18359(14) 0.24071(9) 0.08082(5) 0.0274(3) Uani 1 1 d . . . 
H16A H 1.2687 0.2136 0.1037 0.041 Uiso 1 1 calc R . . 
H16B H 1.1513 0.2943 0.0961 0.041 Uiso 1 1 calc R . . 
H16C H 1.2216 0.2534 0.0482 0.041 Uiso 1 1 calc R . . 
C17 C 0.91630(14) 0.30539(8) -0.02053(4) 0.0183(3) Uani 1 1 d . . . 
C18 C 1.01126(16) 0.25543(9) -0.05688(5) 0.0277(3) Uani 1 1 d . . . 
H18A H 1.0270 0.2919 -0.0860 0.042 Uiso 1 1 calc R . . 
H18B H 0.9527 0.2036 -0.0689 0.042 Uiso 1 1 calc R . . 
H18C H 1.1144 0.2390 -0.0389 0.042 Uiso 1 1 calc R . . 
C19 C 0.76536(17) 0.33934(9) -0.05221(5) 0.0285(3) Uani 1 1 d . . . 
H19A H 0.7021 0.3717 -0.0302 0.043 Uiso 1 1 calc R . . 
H19B H 0.7032 0.2908 -0.0675 0.043 Uiso 1 1 calc R . . 
H19C H 0.7946 0.3772 -0.0791 0.043 Uiso 1 1 calc R . . 
C20 C 1.01239(18) 0.38465(9) -0.00192(5) 0.0318(3) Uani 1 1 d . . . 
H20A H 1.0268 0.4216 -0.0309 0.048 Uiso 1 1 calc R . . 
H20B H 1.1162 0.3666 0.0149 0.048 Uiso 1 1 calc R . . 
H20C H 0.9560 0.4166 0.0222 0.048 Uiso 1 1 calc R . . 
C21 C 0.68762(14) 0.16192(8) 0.01663(4) 0.0176(3) Uani 1 1 d . . . 
C22 C 0.70634(15) 0.11327(8) -0.03296(4) 0.0234(3) Uani 1 1 d . . . 
H22A H 0.6195 0.0719 -0.0402 0.035 Uiso 1 1 calc R . . 
H22B H 0.8077 0.0826 -0.0292 0.035 Uiso 1 1 calc R . . 
H22C H 0.7036 0.1544 -0.0611 0.035 Uiso 1 1 calc R . . 
C23 C 0.53205(14) 0.21183(9) 0.01000(5) 0.0268(3) Uani 1 1 d . . . 
H23A H 0.5352 0.2553 -0.0166 0.040 Uiso 1 1 calc R . . 
H23B H 0.5169 0.2401 0.0421 0.040 Uiso 1 1 calc R . . 
H23C H 0.4441 0.1721 0.0003 0.040 Uiso 1 1 calc R . . 
C24 C 0.66927(16) 0.09312(9) 0.05738(5) 0.0298(3) Uani 1 1 d . . . 
H24A H 0.6621 0.1212 0.0901 0.045 Uiso 1 1 calc R . . 
H24B H 0.7613 0.0547 0.0605 0.045 Uiso 1 1 calc R . . 
H24C H 0.5728 0.0597 0.0474 0.045 Uiso 1 1 calc R . . 
C25 C 0.46112(16) 0.43117(9) 0.06302(5) 0.0309(3) Uani 1 1 d . . . 
H25A H 0.4172 0.3749 0.0704 0.046 Uiso 1 1 calc R . . 
H25B H 0.5180 0.4265 0.0332 0.046 Uiso 1 1 calc R . . 
H25C H 0.3749 0.4730 0.0562 0.046 Uiso 1 1 calc R . . 
C26 C 0.47369(16) 0.48226(10) 0.16675(5) 0.0349(4) Uani 1 1 d . . . 
H26A H 0.3833 0.5187 0.1542 0.052 Uiso 1 1 calc R . . 
H26B H 0.5358 0.5102 0.1958 0.052 Uiso 1 1 calc R . . 
H26C H 0.4352 0.4265 0.1774 0.052 Uiso 1 1 calc R . . 
C27 C 0.65701(16) 0.57306(8) 0.10077(6) 0.0320(4) Uani 1 1 d . . . 
H27A H 0.5637 0.6102 0.0941 0.048 Uiso 1 1 calc R . . 
H27B H 0.7115 0.5702 0.0703 0.048 Uiso 1 1 calc R . . 
H27C H 0.7290 0.5967 0.1291 0.048 Uiso 1 1 calc R . . 
  
loop_ 
 _atom_site_aniso_label 
 _atom_site_aniso_U_11 
 _atom_site_aniso_U_22 
 _atom_site_aniso_U_33 
 _atom_site_aniso_U_23 
 _atom_site_aniso_U_13 
 _atom_site_aniso_U_12 
Mo1 0.01245(4) 0.01312(5) 0.01036(4) -0.00110(3) 0.00160(3) 0.00043(4) 
Cl1 0.02457(14) 0.02516(15) 0.01928(12) -0.00132(11) 0.00485(11) -0.01066(13) 
Cl2 0.01904(13) 0.02219(14) 0.01809(12) -0.00075(11) 0.00451(10) -0.00600(12) 
P1 0.01514(14) 0.01683(15) 0.01696(13) -0.00061(11) 0.00239(11) 0.00180(12) 
Si1 0.01291(14) 0.01558(15) 0.01099(12) -0.00119(11) 0.00193(11) -0.00097(12) 
Si2 0.01328(14) 0.01165(15) 0.01205(12) -0.00115(11) 0.00256(11) 0.00037(12) 
O1 0.0135(4) 0.0177(4) 0.0120(3) -0.0018(3) 0.0020(3) -0.0014(3) 
O2 0.0151(4) 0.0143(4) 0.0134(3) -0.0016(3) 0.0024(3) 0.0004(3) 
C1 0.0183(6) 0.0336(7) 0.0142(5) -0.0032(5) 0.0054(4) -0.0041(5) 
C2 0.0269(7) 0.0545(10) 0.0264(6) -0.0084(6) 0.0113(5) -0.0193(7) 
C3 0.0224(7) 0.0527(9) 0.0288(6) -0.0053(6) 0.0077(5) 0.0059(7) 
C4 0.0297(7) 0.0458(9) 0.0161(5) 0.0026(6) 0.0072(5) -0.0080(6) 
C5 0.0235(6) 0.0180(6) 0.0177(5) -0.0041(5) 0.0012(5) -0.0035(5) 
C6 0.0424(8) 0.0193(7) 0.0310(7) -0.0018(5) 0.0028(6) 0.0015(6) 
C7 0.0345(7) 0.0291(7) 0.0223(6) -0.0096(5) 0.0022(5) -0.0088(6) 
C8 0.0278(7) 0.0325(7) 0.0263(6) -0.0017(6) 0.0042(5) -0.0125(6) 
C9 0.0233(6) 0.0226(6) 0.0168(5) 0.0018(5) 0.0046(5) 0.0044(5) 
C10 0.0510(9) 0.0192(7) 0.0367(7) 0.0043(6) 0.0170(7) 0.0031(7) 
C11 0.0320(7) 0.0522(9) 0.0209(6) 0.0081(6) 0.0001(6) 0.0176(7) 
C12 0.0266(6) 0.0293(7) 0.0232(6) 0.0002(5) 0.0073(5) 0.0083(6) 
C13 0.0185(6) 0.0165(6) 0.0211(5) -0.0021(5) -0.0010(5) 0.0041(5) 
C14 0.0316(7) 0.0256(7) 0.0402(7) -0.0088(6) -0.0077(6) 0.0124(6) 
C15 0.0332(7) 0.0302(7) 0.0255(6) 0.0063(6) -0.0067(6) 0.0006(6) 
C16 0.0166(6) 0.0323(7) 0.0319(6) -0.0083(6) -0.0028(5) 0.0037(6) 
C17 0.0227(6) 0.0180(6) 0.0151(5) 0.0005(4) 0.0062(5) -0.0013(5) 
C18 0.0329(7) 0.0303(7) 0.0223(6) -0.0037(5) 0.0131(5) -0.0023(6) 
C19 0.0387(8) 0.0260(7) 0.0217(6) 0.0060(5) 0.0072(6) 0.0072(6) 
C20 0.0508(8) 0.0239(7) 0.0227(6) -0.0005(5) 0.0122(6) -0.0138(6) 
C21 0.0174(5) 0.0181(6) 0.0172(5) -0.0052(4) 0.0023(4) -0.0035(5) 
C22 0.0251(6) 0.0236(6) 0.0210(5) -0.0076(5) 0.0011(5) -0.0028(5) 
C23 0.0150(6) 0.0330(7) 0.0325(6) -0.0089(6) 0.0032(5) -0.0031(6) 
C24 0.0350(7) 0.0282(7) 0.0266(6) -0.0001(5) 0.0057(6) -0.0147(6) 
C25 0.0313(7) 0.0248(7) 0.0327(7) -0.0032(6) -0.0119(6) 0.0051(6) 
C26 0.0342(7) 0.0416(8) 0.0320(7) 0.0037(6) 0.0160(6) 0.0162(7) 
C27 0.0254(7) 0.0191(7) 0.0501(8) 0.0067(6) -0.0011(6) 0.0019(6) 
  
_geom_special_details 
; 
 All esds (except the esd in the dihedral angle between two l.s. planes) 
 are estimated using the full covariance matrix.  The cell esds are taken 
 into account individually in the estimation of esds in distances, angles 
 and torsion angles; correlations between esds in cell parameters are only 
 used when they are defined by crystal symmetry.  An approximate (isotropic) 
 treatment of cell esds is used for estimating esds involving l.s. planes. 
; 
  
loop_ 
 _geom_bond_atom_site_label_1 
 _geom_bond_atom_site_label_2 
 _geom_bond_distance 
 _geom_bond_site_symmetry_2 
 _geom_bond_publ_flag 
Mo1 O1 1.8317(7) . ? 
Mo1 O2 1.8358(7) . ? 
Mo1 P1 2.3933(3) . ? 
Mo1 Cl1 2.4277(3) . ? 
Mo1 Cl2 2.4424(3) . ? 
P1 C26 1.7948(14) . ? 
P1 C25 1.8045(13) . ? 
P1 C27 1.8072(14) . ? 
Si1 O1 1.6931(8) . ? 
Si1 C5 1.9130(13) . ? 
Si1 C9 1.9142(13) . ? 
Si1 C1 1.9255(13) . ? 
Si2 O2 1.6890(8) . ? 
Si2 C13 1.9126(12) . ? 
Si2 C21 1.9194(12) . ? 
Si2 C17 1.9232(12) . ? 
C1 C3 1.5350(19) . ? 
C1 C2 1.5365(18) . ? 
C1 C4 1.5404(16) . ? 
C5 C8 1.5390(18) . ? 
C5 C7 1.5409(16) . ? 
C5 C6 1.5399(18) . ? 
C9 C12 1.5383(17) . ? 
C9 C10 1.5394(19) . ? 
C9 C11 1.5390(17) . ? 
C13 C16 1.5320(17) . ? 
C13 C14 1.5345(18) . ? 
C13 C15 1.5400(18) . ? 
C17 C20 1.5267(18) . ? 
C17 C19 1.5388(17) . ? 
C17 C18 1.5416(17) . ? 
C21 C23 1.5258(17) . ? 
C21 C22 1.5417(16) . ? 
C21 C24 1.5418(17) . ? 
  
loop_ 
 _geom_angle_atom_site_label_1 
 _geom_angle_atom_site_label_2 
 _geom_angle_atom_site_label_3 
 _geom_angle 
 _geom_angle_site_symmetry_1 
 _geom_angle_site_symmetry_3 
 _geom_angle_publ_flag 
O1 Mo1 O2 157.91(3) . . ? 
O1 Mo1 P1 100.57(3) . . ? 
O2 Mo1 P1 101.49(2) . . ? 
O1 Mo1 Cl1 90.43(3) . . ? 
O2 Mo1 Cl1 88.71(3) . . ? 
P1 Mo1 Cl1 89.810(12) . . ? 
O1 Mo1 Cl2 89.28(3) . . ? 
O2 Mo1 Cl2 90.48(3) . . ? 
P1 Mo1 Cl2 93.075(12) . . ? 
Cl1 Mo1 Cl2 177.105(11) . . ? 
C26 P1 C25 104.79(7) . . ? 
C26 P1 C27 104.91(7) . . ? 
C25 P1 C27 105.24(7) . . ? 
C26 P1 Mo1 112.08(5) . . ? 
C25 P1 Mo1 110.85(5) . . ? 
C27 P1 Mo1 117.93(5) . . ? 
O1 Si1 C5 106.58(5) . . ? 
O1 Si1 C9 103.92(5) . . ? 
C5 Si1 C9 113.74(6) . . ? 
O1 Si1 C1 105.72(5) . . ? 
C5 Si1 C1 112.27(6) . . ? 
C9 Si1 C1 113.63(6) . . ? 
O2 Si2 C13 103.58(5) . . ? 
O2 Si2 C21 107.68(5) . . ? 
C13 Si2 C21 113.17(5) . . ? 
O2 Si2 C17 104.75(5) . . ? 
C13 Si2 C17 114.19(5) . . ? 
C21 Si2 C17 112.46(5) . . ? 
Si1 O1 Mo1 163.57(5) . . ? 
Si2 O2 Mo1 158.85(5) . . ? 
C3 C1 C2 106.07(11) . . ? 
C3 C1 C4 107.39(10) . . ? 
C2 C1 C4 107.98(11) . . ? 
C3 C1 Si1 112.02(9) . . ? 
C2 C1 Si1 111.27(8) . . ? 
C4 C1 Si1 111.83(8) . . ? 
C8 C5 C7 106.67(10) . . ? 
C8 C5 C6 105.75(10) . . ? 
C7 C5 C6 109.11(10) . . ? 
C8 C5 Si1 113.03(9) . . ? 
C7 C5 Si1 111.92(9) . . ? 
C6 C5 Si1 110.09(8) . . ? 
C12 C9 C10 107.00(10) . . ? 
C12 C9 C11 107.68(10) . . ? 
C10 C9 C11 108.00(11) . . ? 
C12 C9 Si1 111.18(8) . . ? 
C10 C9 Si1 110.21(9) . . ? 
C11 C9 Si1 112.56(9) . . ? 
C16 C13 C14 107.96(10) . . ? 
C16 C13 C15 106.65(10) . . ? 
C14 C13 C15 108.37(11) . . ? 
C16 C13 Si2 110.11(8) . . ? 
C14 C13 Si2 113.09(8) . . ? 
C15 C13 Si2 110.41(9) . . ? 
C20 C17 C19 106.09(10) . . ? 
C20 C17 C18 107.91(10) . . ? 
C19 C17 C18 107.34(9) . . ? 
C20 C17 Si2 111.26(8) . . ? 
C19 C17 Si2 110.86(8) . . ? 
C18 C17 Si2 113.05(8) . . ? 
C23 C21 C22 109.30(9) . . ? 
C23 C21 C24 105.80(10) . . ? 
C22 C21 C24 106.68(10) . . ? 
C23 C21 Si2 111.22(8) . . ? 
C22 C21 Si2 111.12(8) . . ? 
C24 C21 Si2 112.46(8) . . ? 
  
_diffrn_measured_fraction_theta_max    0.993 
_diffrn_reflns_theta_full              28.28 
_diffrn_measured_fraction_theta_full   0.993 
_refine_diff_density_max    1.125 
_refine_diff_density_min   -0.518 
_refine_diff_density_rms    0.063 

#===end

data_dk14   
_audit_creation_method            SHELXL-97 
_chemical_name_systematic 
; 
 ? 
; 
_chemical_name_common             ? 
_chemical_melting_point           ? 
_chemical_formula_moiety          
 'C30 H72 O2 P2 Si2 W' 
_chemical_formula_sum 
 'C30 H72 O2 P2 Si2 W' 
_chemical_formula_weight          766.85 
  
loop_ 
 _atom_type_symbol 
 _atom_type_description 
 _atom_type_scat_dispersion_real 
 _atom_type_scat_dispersion_imag 
 _atom_type_scat_source 
 'C'  'C'   0.0033   0.0016 
 'International Tables Vol C Tables 4.2.6.8 and 6.1.1.4' 
 'H'  'H'   0.0000   0.0000 
 'International Tables Vol C Tables 4.2.6.8 and 6.1.1.4' 
 'O'  'O'   0.0106   0.0060 
 'International Tables Vol C Tables 4.2.6.8 and 6.1.1.4' 
 'P'  'P'   0.1023   0.0942 
 'International Tables Vol C Tables 4.2.6.8 and 6.1.1.4' 
 'Si'  'Si'   0.0817   0.0704 
 'International Tables Vol C Tables 4.2.6.8 and 6.1.1.4' 
 'W'  'W'  -0.8490   6.8722 
 'International Tables Vol C Tables 4.2.6.8 and 6.1.1.4' 
  
_symmetry_cell_setting            Triclinic 
_symmetry_space_group_name_H-M    P-1 
  
loop_ 
 _symmetry_equiv_pos_as_xyz 
 'x, y, z' 
 '-x, -y, -z' 
  
_cell_length_a                    8.6908(9) 
_cell_length_b                    13.0276(16) 
_cell_length_c                    17.333(2) 
_cell_angle_alpha                 99.970(6) 
_cell_angle_beta                  94.754(6) 
_cell_angle_gamma                 101.066(6) 
_cell_volume                      1883.2(4) 
_cell_formula_units_Z             2 
_cell_measurement_temperature     173(2) 
_cell_measurement_reflns_used     2092 
_cell_measurement_theta_min       0.00 
_cell_measurement_theta_max       0.00 
  
_exptl_crystal_description        rod 
_exptl_crystal_colour             red 
_exptl_crystal_size_max           0.20 
_exptl_crystal_size_mid           0.05 
_exptl_crystal_size_min           0.03 
_exptl_crystal_density_meas       ? 
_exptl_crystal_density_diffrn     1.352 
_exptl_crystal_density_method     'not measured' 
_exptl_crystal_F_000              800 
_exptl_absorpt_coefficient_mu     3.239 
_exptl_absorpt_correction_type    multi-scan 
_exptl_absorpt_correction_T_min   0.5636 
_exptl_absorpt_correction_T_max   0.9234 
_exptl_absorpt_process_details    SADABS 
  
_exptl_special_details 
; 
 ? 
; 
  
_diffrn_ambient_temperature       173(2) 
_diffrn_radiation_wavelength      0.71073 
_diffrn_radiation_type            MoK\a 
_diffrn_radiation_source          'fine-focus sealed tube' 
_diffrn_radiation_monochromator   graphite 
_diffrn_measurement_device_type   'Bruker X8 APEX II diffractometer' 
_diffrn_measurement_method        'phi and omega scans' 
_diffrn_detector_area_resol_mean  ? 
_diffrn_standards_number          ? 
_diffrn_standards_interval_count  ? 
_diffrn_standards_interval_time   ? 
_diffrn_standards_decay_%         ? 
_diffrn_reflns_number             32273 
_diffrn_reflns_av_R_equivalents   0.0914 
_diffrn_reflns_av_sigmaI/netI     0.0909 
_diffrn_reflns_limit_h_min        -10 
_diffrn_reflns_limit_h_max        10 
_diffrn_reflns_limit_k_min        -15 
_diffrn_reflns_limit_k_max        15 
_diffrn_reflns_limit_l_min        -20 
_diffrn_reflns_limit_l_max        20 
_diffrn_reflns_theta_min          1.62 
_diffrn_reflns_theta_max          24.71 
_reflns_number_total              6351 
_reflns_number_gt                 4775 
_reflns_threshold_expression      >2sigma(I) 
  
_computing_data_collection        'Bruker APEX2' 
_computing_cell_refinement        'Bruker SAINT+' 
_computing_data_reduction         'Bruker SAINT+' 
_computing_structure_solution     'SHELXS-97 (Sheldrick, 1990)' 
_computing_structure_refinement   'SHELXL-97 (Sheldrick, 1997)' 
_computing_molecular_graphics     'Bruker SHELXTL' 
_computing_publication_material   'Bruker SHELXTL' 
  
_refine_special_details 
; 
 Refinement of F^2^ against ALL reflections.  The weighted R-factor wR and 
 goodness of fit S are based on F^2^, conventional R-factors R are based 
 on F, with F set to zero for negative F^2^. The threshold expression of 
 F^2^ > 2sigma(F^2^) is used only for calculating R-factors(gt) etc. and is 
 not relevant to the choice of reflections for refinement.  R-factors based 
 on F^2^ are statistically about twice as large as those based on F, and R- 
 factors based on ALL data will be even larger. 
 PMe3 groups are partially disordered by rotation along W-P bonds.
Hydride H atom was not visible in a diff. Fourier map, but was added to 
the H-atoms counts in the chemical formula.
; 
  
_refine_ls_structure_factor_coef  Fsqd 
_refine_ls_matrix_type            full 
_refine_ls_weighting_scheme       calc 
_refine_ls_weighting_details 
 'calc w=1/[\s^2^(Fo^2^)+(0.0470P)^2^+0.0000P] where P=(Fo^2^+2Fc^2^)/3' 
_atom_sites_solution_primary      direct 
_atom_sites_solution_secondary    difmap 
_atom_sites_solution_hydrogens    geom 
_refine_ls_hydrogen_treatment     riding
_refine_ls_extinction_method      none 
_refine_ls_extinction_coef        ? 
_refine_ls_number_reflns          6351 
_refine_ls_number_parameters      375 
_refine_ls_number_restraints      0 
_refine_ls_R_factor_all           0.0660 
_refine_ls_R_factor_gt            0.0438 
_refine_ls_wR_factor_ref          0.1017 
_refine_ls_wR_factor_gt           0.0957 
_refine_ls_goodness_of_fit_ref    1.006 
_refine_ls_restrained_S_all       1.006 
_refine_ls_shift/su_max           0.198 
_refine_ls_shift/su_mean          0.009 
  
loop_ 
 _atom_site_label 
 _atom_site_type_symbol 
 _atom_site_fract_x 
 _atom_site_fract_y 
 _atom_site_fract_z 
 _atom_site_U_iso_or_equiv 
 _atom_site_adp_type 
 _atom_site_occupancy 
 _atom_site_symmetry_multiplicity 
 _atom_site_calc_flag 
 _atom_site_refinement_flags 
 _atom_site_disorder_assembly 
 _atom_site_disorder_group 
W1 W 0.27743(2) 0.224795(14) 0.321568(10) 0.02757(5) Uani 1 1 d . A . 
P1 P 0.45343(14) 0.20099(11) 0.42449(7) 0.0373(4) Uani 1 1 d . . . 
P2 P 0.14774(15) 0.34065(11) 0.40072(8) 0.0425(4) Uani 1 1 d . . . 
Si1 Si 0.11282(14) -0.04281(10) 0.24239(7) 0.0296(3) Uani 1 1 d . A . 
Si2 Si 0.36855(15) 0.37026(10) 0.17179(7) 0.0303(3) Uani 1 1 d . A . 
O1 O 0.2211(3) 0.0784(2) 0.26854(18) 0.0360(9) Uani 1 1 d . . . 
O2 O 0.3045(4) 0.3045(2) 0.23890(17) 0.0412(9) Uani 1 1 d . . . 
C1 C 0.5004(7) 0.3237(5) 0.3914(4) 0.080(2) Uani 1 1 d . A . 
H1A H 0.5944 0.3344 0.3628 0.096 Uiso 1 1 calc R . . 
H1B H 0.4903 0.3884 0.4284 0.096 Uiso 1 1 calc R . . 
C2 C 0.4707(12) 0.2258(7) 0.5302(5) 0.029(3) Uani 0.483(10) 1 d P A 1 
H2A H 0.5653 0.2041 0.5508 0.044 Uiso 0.483(10) 1 calc PR A 1 
H2B H 0.3771 0.1848 0.5472 0.044 Uiso 0.483(10) 1 calc PR A 1 
H2C H 0.4790 0.3020 0.5502 0.044 Uiso 0.483(10) 1 calc PR A 1 
C2' C 0.4171(14) 0.1690(12) 0.5234(6) 0.074(5) Uani 0.517(10) 1 d P A 2 
H2'A H 0.5165 0.1630 0.5516 0.111 Uiso 0.517(10) 1 calc PR A 2 
H2'B H 0.3405 0.1013 0.5165 0.111 Uiso 0.517(10) 1 calc PR A 2 
H2'C H 0.3753 0.2259 0.5539 0.111 Uiso 0.517(10) 1 calc PR A 2 
C3 C 0.5950(6) 0.1188(5) 0.3997(3) 0.0636(17) Uani 1 1 d . A . 
H3A H 0.6943 0.1480 0.4345 0.095 Uiso 1 1 calc R . . 
H3B H 0.6144 0.1179 0.3447 0.095 Uiso 1 1 calc R . . 
H3C H 0.5530 0.0459 0.4065 0.095 Uiso 1 1 calc R . . 
C4 C -0.0429(7) 0.3453(6) 0.3574(4) 0.096(2) Uani 1 1 d . A . 
H4A H -0.1164 0.2781 0.3573 0.144 Uiso 1 1 calc R . . 
H4B H -0.0372 0.3561 0.3030 0.144 Uiso 1 1 calc R . . 
H4C H -0.0801 0.4044 0.3879 0.144 Uiso 1 1 calc R . . 
C5 C 0.2082(10) 0.4891(6) 0.4144(5) 0.136(4) Uani 1 1 d . A . 
H5A H 0.1190 0.5213 0.4290 0.205 Uiso 1 1 calc R . . 
H5B H 0.2400 0.5085 0.3650 0.205 Uiso 1 1 calc R . . 
H5C H 0.2970 0.5153 0.4563 0.205 Uiso 1 1 calc R . . 
C6 C 0.0921(13) 0.3145(11) 0.4927(7) 0.089(4) Uani 0.553(10) 1 d P A 1 
H6'A H 0.0400 0.3703 0.5169 0.133 Uiso 0.553(10) 1 calc PR A 1 
H6'B H 0.1863 0.3137 0.5276 0.133 Uiso 0.553(10) 1 calc PR A 1 
H6'C H 0.0191 0.2451 0.4844 0.133 Uiso 0.553(10) 1 calc PR A 1 
C6' C 0.1899(18) 0.3798(14) 0.5075(7) 0.107(5) Uani 0.447(10) 1 d P A 2 
H6A H 0.1245 0.4299 0.5269 0.161 Uiso 0.447(10) 1 calc PR A 2 
H6B H 0.3017 0.4141 0.5218 0.161 Uiso 0.447(10) 1 calc PR A 2 
H6C H 0.1662 0.3165 0.5314 0.161 Uiso 0.447(10) 1 calc PR A 2 
C7 C 0.0580(5) -0.0991(4) 0.3347(3) 0.0485(15) Uani 1 1 d . . . 
C8 C -0.0731(6) -0.0519(5) 0.3734(3) 0.0722(19) Uani 1 1 d . A . 
H8A H -0.1724 -0.0759 0.3380 0.108 Uiso 1 1 calc R . . 
H8B H -0.0434 0.0261 0.3834 0.108 Uiso 1 1 calc R . . 
H8C H -0.0869 -0.0759 0.4235 0.108 Uiso 1 1 calc R . . 
C9 C 0.2022(6) -0.0673(5) 0.3991(3) 0.0745(19) Uani 1 1 d . A . 
H9A H 0.1734 -0.0948 0.4463 0.112 Uiso 1 1 calc R . . 
H9B H 0.2350 0.0105 0.4125 0.112 Uiso 1 1 calc R . . 
H9C H 0.2895 -0.0976 0.3793 0.112 Uiso 1 1 calc R . . 
C10 C 0.0065(7) -0.2205(4) 0.3154(4) 0.0761(19) Uani 1 1 d . A . 
H10A H -0.0179 -0.2469 0.3636 0.114 Uiso 1 1 calc R . . 
H10B H 0.0920 -0.2513 0.2939 0.114 Uiso 1 1 calc R . . 
H10C H -0.0877 -0.2412 0.2764 0.114 Uiso 1 1 calc R . . 
C11 C 0.2398(5) -0.1247(4) 0.1834(3) 0.0361(13) Uani 1 1 d . . . 
C12 C 0.3696(6) -0.1515(4) 0.2373(4) 0.0595(17) Uani 1 1 d . A . 
H12A H 0.3211 -0.1994 0.2705 0.089 Uiso 1 1 calc R . . 
H12B H 0.4314 -0.0858 0.2709 0.089 Uiso 1 1 calc R . . 
H12C H 0.4391 -0.1865 0.2050 0.089 Uiso 1 1 calc R . . 
C13 C 0.1467(7) -0.2286(4) 0.1325(4) 0.0662(19) Uani 1 1 d . A . 
H13A H 0.0737 -0.2131 0.0921 0.099 Uiso 1 1 calc R . . 
H13B H 0.0868 -0.2714 0.1657 0.099 Uiso 1 1 calc R . . 
H13C H 0.2198 -0.2684 0.1071 0.099 Uiso 1 1 calc R . . 
C14 C 0.3283(6) -0.0593(4) 0.1301(3) 0.0483(15) Uani 1 1 d . A . 
H14A H 0.3950 -0.1012 0.1011 0.072 Uiso 1 1 calc R . . 
H14B H 0.3946 0.0060 0.1622 0.072 Uiso 1 1 calc R . . 
H14C H 0.2525 -0.0407 0.0927 0.072 Uiso 1 1 calc R . . 
C15 C -0.0734(5) -0.0330(3) 0.1801(3) 0.0306(12) Uani 1 1 d . . . 
C16 C -0.0366(6) -0.0106(4) 0.0981(3) 0.0427(15) Uani 1 1 d . A . 
H16A H -0.1310 0.0024 0.0697 0.064 Uiso 1 1 calc R . . 
H16B H -0.0048 -0.0724 0.0680 0.064 Uiso 1 1 calc R . . 
H16C H 0.0493 0.0522 0.1047 0.064 Uiso 1 1 calc R . . 
C17 C -0.1431(5) 0.0595(4) 0.2187(3) 0.0423(14) Uani 1 1 d . A . 
H17A H -0.2344 0.0658 0.1841 0.063 Uiso 1 1 calc R . . 
H17B H -0.0630 0.1259 0.2275 0.063 Uiso 1 1 calc R . . 
H17C H -0.1765 0.0462 0.2694 0.063 Uiso 1 1 calc R . . 
C18 C -0.2031(6) -0.1345(4) 0.1650(3) 0.0501(16) Uani 1 1 d . A . 
H18A H -0.2349 -0.1499 0.2154 0.075 Uiso 1 1 calc R . . 
H18B H -0.1629 -0.1944 0.1375 0.075 Uiso 1 1 calc R . . 
H18C H -0.2945 -0.1243 0.1324 0.075 Uiso 1 1 calc R . . 
C19 C 0.4738(5) 0.2799(3) 0.1058(3) 0.0292(12) Uani 1 1 d . . . 
C20 C 0.5836(5) 0.2300(4) 0.1555(3) 0.0432(15) Uani 1 1 d . A . 
H20A H 0.6216 0.1748 0.1210 0.065 Uiso 1 1 calc R . . 
H20B H 0.5252 0.1982 0.1946 0.065 Uiso 1 1 calc R . . 
H20C H 0.6738 0.2854 0.1827 0.065 Uiso 1 1 calc R . . 
C21 C 0.3516(6) 0.1861(4) 0.0566(3) 0.0427(15) Uani 1 1 d . A . 
H21A H 0.2823 0.2125 0.0207 0.064 Uiso 1 1 calc R . . 
H21B H 0.2884 0.1491 0.0918 0.064 Uiso 1 1 calc R . . 
H21C H 0.4057 0.1365 0.0259 0.064 Uiso 1 1 calc R . . 
C22 C 0.5701(6) 0.3328(4) 0.0488(3) 0.0542(16) Uani 1 1 d . A . 
H22A H 0.6212 0.2810 0.0185 0.081 Uiso 1 1 calc R . . 
H22B H 0.6508 0.3930 0.0785 0.081 Uiso 1 1 calc R . . 
H22C H 0.5004 0.3587 0.0127 0.081 Uiso 1 1 calc R . . 
C23 C 0.1823(5) 0.3948(3) 0.1167(3) 0.0335(12) Uani 1 1 d . . . 
C24 C 0.2043(6) 0.4251(4) 0.0368(3) 0.0442(14) Uani 1 1 d . A . 
H24A H 0.2258 0.3644 0.0004 0.066 Uiso 1 1 calc R . . 
H24B H 0.2934 0.4860 0.0429 0.066 Uiso 1 1 calc R . . 
H24C H 0.1080 0.4444 0.0156 0.066 Uiso 1 1 calc R . . 
C25 C 0.1234(6) 0.4866(4) 0.1669(3) 0.0583(17) Uani 1 1 d . A . 
H25A H 0.2046 0.5524 0.1751 0.087 Uiso 1 1 calc R . . 
H25B H 0.1023 0.4685 0.2181 0.087 Uiso 1 1 calc R . . 
H25C H 0.0262 0.4972 0.1394 0.087 Uiso 1 1 calc R . . 
C26 C 0.0474(5) 0.2971(4) 0.1054(3) 0.0468(15) Uani 1 1 d . A . 
H26A H -0.0470 0.3115 0.0779 0.070 Uiso 1 1 calc R . . 
H26B H 0.0245 0.2813 0.1570 0.070 Uiso 1 1 calc R . . 
H26C H 0.0782 0.2358 0.0740 0.070 Uiso 1 1 calc R . . 
C27 C 0.5147(7) 0.5001(4) 0.2171(4) 0.064(2) Uani 1 1 d . . . 
C28 C 0.5400(7) 0.5782(4) 0.1586(4) 0.077(2) Uani 1 1 d . A . 
H28A H 0.4425 0.6032 0.1479 0.115 Uiso 1 1 calc R . . 
H28B H 0.5681 0.5414 0.1092 0.115 Uiso 1 1 calc R . . 
H28C H 0.6255 0.6393 0.1820 0.115 Uiso 1 1 calc R . . 
C29 C 0.4633(9) 0.5578(5) 0.2915(4) 0.102(3) Uani 1 1 d . A . 
H29A H 0.5315 0.6289 0.3079 0.152 Uiso 1 1 calc R . . 
H29B H 0.4716 0.5172 0.3336 0.152 Uiso 1 1 calc R . . 
H29C H 0.3536 0.5646 0.2807 0.152 Uiso 1 1 calc R . . 
C30 C 0.6791(7) 0.4819(5) 0.2443(4) 0.094(3) Uani 1 1 d . A . 
H30A H 0.7486 0.5504 0.2687 0.141 Uiso 1 1 calc R . . 
H30B H 0.7240 0.4488 0.1987 0.141 Uiso 1 1 calc R . . 
H30C H 0.6693 0.4348 0.2829 0.141 Uiso 1 1 calc R . . 
  
loop_ 
 _atom_site_aniso_label 
 _atom_site_aniso_U_11 
 _atom_site_aniso_U_22 
 _atom_site_aniso_U_33 
 _atom_site_aniso_U_23 
 _atom_site_aniso_U_13 
 _atom_site_aniso_U_12 
W1 0.02604(9) 0.03779(10) 0.02245(10) 0.00634(8) 0.00403(7) 0.01452(8) 
P1 0.0350(7) 0.0502(8) 0.0273(7) 0.0071(6) 0.0000(6) 0.0124(6) 
P2 0.0394(7) 0.0551(8) 0.0341(7) -0.0002(6) 0.0138(6) 0.0168(6) 
Si1 0.0273(6) 0.0355(7) 0.0323(7) 0.0160(6) 0.0084(5) 0.0114(6) 
Si2 0.0344(7) 0.0269(6) 0.0303(7) 0.0062(6) -0.0033(6) 0.0102(6) 
O1 0.0293(16) 0.0373(17) 0.0387(19) 0.0006(15) -0.0060(14) 0.0106(14) 
O2 0.0536(18) 0.0568(18) 0.0264(17) 0.0182(14) 0.0065(15) 0.0338(16) 
C1 0.079(4) 0.092(5) 0.076(5) 0.025(4) 0.013(4) 0.023(4) 
C2 0.046(6) 0.017(5) 0.021(5) 0.003(4) -0.007(4) 0.001(4) 
C2' 0.058(7) 0.151(12) 0.027(6) 0.033(7) 0.008(5) 0.045(8) 
C3 0.054(3) 0.098(4) 0.053(4) 0.024(3) 0.004(3) 0.045(3) 
C4 0.076(3) 0.148(5) 0.105(5) 0.056(4) 0.053(3) 0.078(4) 
C5 0.131(6) 0.097(6) 0.171(8) -0.029(6) 0.074(6) 0.025(5) 
C6 0.078(7) 0.149(11) 0.070(7) 0.052(7) 0.047(6) 0.054(7) 
C6' 0.148(10) 0.188(13) 0.027(8) 0.007(8) 0.018(7) 0.145(9) 
C7 0.035(3) 0.074(3) 0.054(3) 0.043(3) 0.014(2) 0.023(2) 
C8 0.065(3) 0.127(5) 0.048(3) 0.048(3) 0.033(3) 0.040(3) 
C9 0.056(3) 0.137(5) 0.057(3) 0.067(3) 0.016(3) 0.039(3) 
C10 0.065(4) 0.097(4) 0.095(4) 0.076(3) 0.041(3) 0.023(3) 
C11 0.033(2) 0.034(2) 0.046(3) 0.015(2) 0.012(2) 0.010(2) 
C12 0.040(3) 0.062(3) 0.096(4) 0.043(3) 0.020(3) 0.026(3) 
C13 0.077(4) 0.035(3) 0.093(5) 0.002(3) 0.041(3) 0.021(3) 
C14 0.048(3) 0.033(3) 0.071(4) 0.012(3) 0.030(3) 0.014(2) 
C15 0.025(2) 0.034(2) 0.034(3) 0.011(2) 0.001(2) 0.004(2) 
C16 0.042(3) 0.047(3) 0.038(3) 0.017(2) -0.001(2) 0.002(2) 
C17 0.032(2) 0.052(3) 0.050(3) 0.017(2) 0.004(2) 0.018(2) 
C18 0.036(3) 0.048(3) 0.065(4) 0.021(3) 0.010(3) -0.006(3) 
C19 0.027(2) 0.026(2) 0.037(3) 0.013(2) 0.008(2) 0.0041(19) 
C20 0.035(3) 0.044(3) 0.055(3) 0.019(2) 0.006(2) 0.011(2) 
C21 0.048(3) 0.032(3) 0.046(3) 0.000(2) 0.004(2) 0.012(2) 
C22 0.046(3) 0.056(3) 0.075(4) 0.034(3) 0.022(3) 0.021(3) 
C23 0.034(2) 0.038(2) 0.041(3) 0.026(2) 0.016(2) 0.017(2) 
C24 0.045(3) 0.046(3) 0.051(3) 0.030(2) 0.006(2) 0.014(2) 
C25 0.057(3) 0.064(3) 0.073(4) 0.030(3) 0.021(3) 0.040(3) 
C26 0.021(2) 0.056(3) 0.070(4) 0.034(3) 0.004(2) 0.006(2) 
C27 0.068(4) 0.035(3) 0.077(4) -0.001(3) -0.024(3) 0.005(3) 
C28 0.070(4) 0.027(3) 0.117(6) 0.004(3) -0.025(4) -0.005(3) 
C29 0.145(6) 0.071(4) 0.074(5) -0.019(4) -0.039(5) 0.036(4) 
C30 0.086(5) 0.051(4) 0.122(6) 0.002(4) -0.055(4) 0.002(4) 
  
_geom_special_details 
; 
 All esds (except the esd in the dihedral angle between two l.s. planes) 
 are estimated using the full covariance matrix.  The cell esds are taken 
 into account individually in the estimation of esds in distances, angles 
 and torsion angles; correlations between esds in cell parameters are only 
 used when they are defined by crystal symmetry.  An approximate (isotropic) 
 treatment of cell esds is used for estimating esds involving l.s. planes. 
; 
  
loop_ 
 _geom_bond_atom_site_label_1 
 _geom_bond_atom_site_label_2 
 _geom_bond_distance 
 _geom_bond_site_symmetry_2 
 _geom_bond_publ_flag 
W1 O2 1.914(3) . ? 
W1 O1 1.918(3) . ? 
W1 C1 2.235(6) . ? 
W1 P1 2.3537(13) . ? 
W1 P2 2.3713(13) . ? 
P1 C1 1.777(7) . ? 
P1 C2 1.793(9) . ? 
P1 C3 1.811(5) . ? 
P1 C2' 1.871(12) . ? 
P2 C4 1.778(6) . ? 
P2 C6 1.773(11) . ? 
P2 C6' 1.820(13) . ? 
P2 C5 1.872(7) . ? 
Si1 O1 1.642(3) . ? 
Si1 C15 1.908(4) . ? 
Si1 C11 1.913(5) . ? 
Si1 C7 1.930(5) . ? 
Si2 O2 1.633(3) . ? 
Si2 C27 1.908(5) . ? 
Si2 C19 1.911(5) . ? 
Si2 C23 1.919(5) . ? 
C7 C10 1.528(7) . ? 
C7 C8 1.542(7) . ? 
C7 C9 1.548(7) . ? 
C11 C14 1.519(7) . ? 
C11 C13 1.521(6) . ? 
C11 C12 1.536(7) . ? 
C15 C17 1.528(6) . ? 
C15 C18 1.533(6) . ? 
C15 C16 1.545(7) . ? 
C19 C22 1.517(7) . ? 
C19 C21 1.530(6) . ? 
C19 C20 1.540(6) . ? 
C23 C24 1.521(7) . ? 
C23 C26 1.528(6) . ? 
C23 C25 1.549(7) . ? 
C27 C29 1.522(9) . ? 
C27 C30 1.542(8) . ? 
C27 C28 1.556(9) . ? 
  
loop_ 
 _geom_angle_atom_site_label_1 
 _geom_angle_atom_site_label_2 
 _geom_angle_atom_site_label_3 
 _geom_angle 
 _geom_angle_site_symmetry_1 
 _geom_angle_site_symmetry_3 
 _geom_angle_publ_flag 
O2 W1 O1 104.87(13) . . ? 
O2 W1 C1 91.04(19) . . ? 
O1 W1 C1 132.33(19) . . ? 
O2 W1 P1 132.79(9) . . ? 
O1 W1 P1 96.84(9) . . ? 
C1 W1 P1 45.47(17) . . ? 
O2 W1 P2 96.83(10) . . ? 
O1 W1 P2 134.62(9) . . ? 
C1 W1 P2 85.56(18) . . ? 
P1 W1 P2 96.74(5) . . ? 
C1 P1 C2 109.7(4) . . ? 
C1 P1 C3 111.4(3) . . ? 
C2 P1 C3 104.5(4) . . ? 
C1 P1 C2' 132.3(5) . . ? 
C2 P1 C2' 24.4(5) . . ? 
C3 P1 C2' 99.2(5) . . ? 
C1 P1 W1 63.7(2) . . ? 
C2 P1 W1 136.4(3) . . ? 
C3 P1 W1 118.23(18) . . ? 
C2' P1 W1 130.5(4) . . ? 
C4 P2 C6 97.1(4) . . ? 
C4 P2 C6' 117.3(5) . . ? 
C6 P2 C6' 34.3(6) . . ? 
C4 P2 C5 90.1(4) . . ? 
C6 P2 C5 105.7(5) . . ? 
C6' P2 C5 78.1(6) . . ? 
C4 P2 W1 114.1(2) . . ? 
C6 P2 W1 120.8(4) . . ? 
C6' P2 W1 124.2(5) . . ? 
C5 P2 W1 122.1(3) . . ? 
O1 Si1 C15 106.93(18) . . ? 
O1 Si1 C11 105.69(18) . . ? 
C15 Si1 C11 112.4(2) . . ? 
O1 Si1 C7 110.14(19) . . ? 
C15 Si1 C7 110.1(2) . . ? 
C11 Si1 C7 111.4(2) . . ? 
O2 Si2 C27 111.9(2) . . ? 
O2 Si2 C19 106.41(18) . . ? 
C27 Si2 C19 108.9(2) . . ? 
O2 Si2 C23 104.97(18) . . ? 
C27 Si2 C23 112.1(2) . . ? 
C19 Si2 C23 112.41(19) . . ? 
Si1 O1 W1 157.2(2) . . ? 
Si2 O2 W1 167.2(2) . . ? 
P1 C1 W1 70.8(2) . . ? 
C10 C7 C8 109.0(4) . . ? 
C10 C7 C9 108.9(5) . . ? 
C8 C7 C9 104.9(4) . . ? 
C10 C7 Si1 111.3(4) . . ? 
C8 C7 Si1 112.8(4) . . ? 
C9 C7 Si1 109.6(3) . . ? 
C14 C11 C13 108.2(4) . . ? 
C14 C11 C12 104.7(4) . . ? 
C13 C11 C12 107.7(4) . . ? 
C14 C11 Si1 110.0(3) . . ? 
C13 C11 Si1 114.0(3) . . ? 
C12 C11 Si1 111.7(3) . . ? 
C17 C15 C18 108.0(4) . . ? 
C17 C15 C16 106.3(4) . . ? 
C18 C15 C16 106.4(4) . . ? 
C17 C15 Si1 111.0(3) . . ? 
C18 C15 Si1 113.8(3) . . ? 
C16 C15 Si1 111.1(3) . . ? 
C22 C19 C21 107.3(4) . . ? 
C22 C19 C20 107.9(4) . . ? 
C21 C19 C20 105.6(4) . . ? 
C22 C19 Si2 115.3(3) . . ? 
C21 C19 Si2 109.3(3) . . ? 
C20 C19 Si2 110.9(3) . . ? 
C24 C23 C26 108.7(4) . . ? 
C24 C23 C25 106.8(4) . . ? 
C26 C23 C25 105.7(4) . . ? 
C24 C23 Si2 114.7(3) . . ? 
C26 C23 Si2 110.7(3) . . ? 
C25 C23 Si2 109.8(3) . . ? 
C29 C27 C30 104.3(5) . . ? 
C29 C27 C28 108.2(5) . . ? 
C30 C27 C28 106.6(5) . . ? 
C29 C27 Si2 112.1(5) . . ? 
C30 C27 Si2 112.6(4) . . ? 
C28 C27 Si2 112.5(4) . . ? 
  
_diffrn_measured_fraction_theta_max    0.989 
_diffrn_reflns_theta_full              24.71 
_diffrn_measured_fraction_theta_full   0.989 
_refine_diff_density_max    1.731 
_refine_diff_density_min   -0.952 
_refine_diff_density_rms    0.141 

#===end

data_dk18 

 

_audit_creation_method            SHELXL-97

_chemical_name_systematic

;

 ?

;

_chemical_name_common             ?

_chemical_melting_point           ?

_chemical_formula_moiety          
 'C30 H72 Mo O2 P2 Si2'

_chemical_formula_sum

 'C30 H72 Mo O2 P2 Si2'

_chemical_formula_weight          678.94

 

loop_

 _atom_type_symbol

 _atom_type_description

 _atom_type_scat_dispersion_real

 _atom_type_scat_dispersion_imag

 _atom_type_scat_source

 'C'  'C'   0.0033   0.0016

 'International Tables Vol C Tables 4.2.6.8 and 6.1.1.4'

 'H'  'H'   0.0000   0.0000

 'International Tables Vol C Tables 4.2.6.8 and 6.1.1.4'

 'O'  'O'   0.0106   0.0060

 'International Tables Vol C Tables 4.2.6.8 and 6.1.1.4'

 'Si'  'Si'   0.0817   0.0704

 'International Tables Vol C Tables 4.2.6.8 and 6.1.1.4'

 'P'  'P'   0.1023   0.0942

 'International Tables Vol C Tables 4.2.6.8 and 6.1.1.4'

 'Mo'  'Mo'  -1.6832   0.6857

 'International Tables Vol C Tables 4.2.6.8 and 6.1.1.4'

 

_symmetry_cell_setting            Monoclinic

_symmetry_space_group_name_H-M    P2(1)/n

 

loop_

 _symmetry_equiv_pos_as_xyz

 'x, y, z'

 '-x+1/2, y+1/2, -z+1/2'

 '-x, -y, -z'

 'x-1/2, -y-1/2, z-1/2'

 

_cell_length_a                    9.2725(4)

_cell_length_b                    28.0138(13)

_cell_length_c                    15.0447(7)

_cell_angle_alpha                 90.00

_cell_angle_beta                  90.252(3)

_cell_angle_gamma                 90.00

_cell_volume                      3907.9(3)

_cell_formula_units_Z             4

_cell_measurement_temperature     173(2)

_cell_measurement_reflns_used     3529

_cell_measurement_theta_min       2.58

_cell_measurement_theta_max       22.19

 

_exptl_crystal_description        plate

_exptl_crystal_colour             green-red

_exptl_crystal_size_max           0.20

_exptl_crystal_size_mid           0.15

_exptl_crystal_size_min           0.03

_exptl_crystal_density_meas       ?

_exptl_crystal_density_diffrn     1.154

_exptl_crystal_density_method     'not measured'

_exptl_crystal_F_000              1472

_exptl_absorpt_coefficient_mu     0.501

_exptl_absorpt_correction_type    multi-scan

_exptl_absorpt_correction_T_min   0.9064

_exptl_absorpt_correction_T_max   0.9876

_exptl_absorpt_process_details    SADABS

 

_exptl_special_details

;

 ?

;

 

_diffrn_ambient_temperature       173(2)

_diffrn_radiation_wavelength      0.71073

_diffrn_radiation_type            MoK\a

_diffrn_radiation_source          'fine-focus sealed tube'

_diffrn_radiation_monochromator   graphite

_diffrn_measurement_device_type   'Bruker X8 APEX II diffractometer'

_diffrn_measurement_method        'phi and omega scans'

_diffrn_detector_area_resol_mean  ?

_diffrn_standards_number          ?

_diffrn_standards_interval_count  ?

_diffrn_standards_interval_time   ?

_diffrn_standards_decay_%         ?

_diffrn_reflns_number             25756

_diffrn_reflns_av_R_equivalents   0.0728

_diffrn_reflns_av_sigmaI/netI     0.0481

_diffrn_reflns_limit_h_min        -9

_diffrn_reflns_limit_h_max        9

_diffrn_reflns_limit_k_min        -26

_diffrn_reflns_limit_k_max        27

_diffrn_reflns_limit_l_min        -15

_diffrn_reflns_limit_l_max        15

_diffrn_reflns_theta_min          1.45

_diffrn_reflns_theta_max          20.81

_reflns_number_total              4052

_reflns_number_gt                 3529

_reflns_threshold_expression      >2sigma(I)

 

_computing_data_collection        'Bruker APEX2'

_computing_cell_refinement        'Bruker SAINT+'

_computing_data_reduction         'Bruker SAINT+'

_computing_structure_solution     'SHELXS-97 (Sheldrick, 1990)'

_computing_structure_refinement   'SHELXL-97 (Sheldrick, 1997)'

_computing_molecular_graphics     'Bruker SHELXTL'

_computing_publication_material   'Bruker SHELXTL'

 

_refine_special_details

;

 Refinement of F^2^ against ALL reflections.  The weighted R-factor wR and

 goodness of fit S are based on F^2^, conventional R-factors R are based

 on F, with F set to zero for negative F^2^. The threshold expression of

 F^2^ > 2sigma(F^2^) is used only for calculating R-factors(gt) etc. and is

 not relevant to the choice of reflections for refinement.  R-factors based

 on F^2^ are statistically about twice as large as those based on F, and R-

 factors based on ALL data will be even larger.

;

 

_refine_ls_structure_factor_coef  Fsqd

_refine_ls_matrix_type            full

_refine_ls_weighting_scheme       calc

_refine_ls_weighting_details

 'calc w=1/[\s^2^(Fo^2^)+(0.0403P)^2^+16.2911P] where P=(Fo^2^+2Fc^2^)/3'

_atom_sites_solution_primary      direct

_atom_sites_solution_secondary    difmap

_atom_sites_solution_hydrogens    geom

_refine_ls_hydrogen_treatment     riding

_refine_ls_extinction_method      none

_refine_ls_extinction_coef        ?

_refine_ls_number_reflns          4052

_refine_ls_number_parameters      334

_refine_ls_number_restraints      90

_refine_ls_R_factor_all           0.0684

_refine_ls_R_factor_gt            0.0572

_refine_ls_wR_factor_ref          0.1251

_refine_ls_wR_factor_gt           0.1191

_refine_ls_goodness_of_fit_ref    1.079

_refine_ls_restrained_S_all       1.083

_refine_ls_shift/su_max           0.075

_refine_ls_shift/su_mean          0.004

 

loop_

 _atom_site_label

 _atom_site_type_symbol

 _atom_site_fract_x

 _atom_site_fract_y

 _atom_site_fract_z

 _atom_site_U_iso_or_equiv

 _atom_site_adp_type

 _atom_site_occupancy

 _atom_site_symmetry_multiplicity

 _atom_site_calc_flag

 _atom_site_refinement_flags

 _atom_site_disorder_assembly

 _atom_site_disorder_group

Mo1 Mo 0.28995(4) 0.134248(14) 0.62576(2) 0.02469(11) Uani 1 1 d . . .

P1 P 0.19178(14) 0.10210(5) 0.49552(8) 0.0353(4) Uani 1 1 d . . .

P2 P 0.52663(13) 0.12369(5) 0.57758(9) 0.0364(4) Uani 1 1 d . . .

Si1 Si 0.23853(14) 0.05027(5) 0.79331(8) 0.0331(4) Uani 1 1 d . . .

Si2 Si 0.21972(14) 0.25893(5) 0.63915(8) 0.0308(4) Uani 1 1 d . . .

O1 O 0.2689(3) 0.07654(12) 0.6999(2) 0.0435(10) Uani 1 1 d . . .

O2 O 0.2470(3) 0.20186(11) 0.6372(2) 0.0415(10) Uani 1 1 d . . .

C1 C 0.1939(7) 0.0378(2) 0.4919(4) 0.078(2) Uani 1 1 d . . .

H1A H 0.1513 0.0269 0.4357 0.117 Uiso 1 1 calc R . .

H1B H 0.1380 0.0251 0.5417 0.117 Uiso 1 1 calc R . .

H1C H 0.2937 0.0264 0.4962 0.117 Uiso 1 1 calc R . .

C2 C 0.0017(5) 0.1139(2) 0.4790(4) 0.0604(18) Uani 1 1 d . . .

H2A H -0.0304 0.0992 0.4231 0.091 Uiso 1 1 calc R . .

H2B H -0.0144 0.1484 0.4763 0.091 Uiso 1 1 calc R . .

H2C H -0.0532 0.1004 0.5285 0.091 Uiso 1 1 calc R . .

C3 C 0.2570(7) 0.1160(3) 0.3848(3) 0.092(3) Uani 1 1 d . . .

H3A H 0.1996 0.0986 0.3406 0.138 Uiso 1 1 calc R . .

H3B H 0.3584 0.1065 0.3800 0.138 Uiso 1 1 calc R . .

H3C H 0.2481 0.1504 0.3741 0.138 Uiso 1 1 calc R . .

C4 C 0.5904(6) 0.1534(3) 0.4785(4) 0.103(3) Uani 1 1 d . . .

H4A H 0.6914 0.1448 0.4682 0.155 Uiso 1 1 calc R . .

H4B H 0.5826 0.1880 0.4862 0.155 Uiso 1 1 calc R . .

H4C H 0.5318 0.1435 0.4274 0.155 Uiso 1 1 calc R . .

C5 C 0.6629(6) 0.1432(3) 0.6548(4) 0.082(2) Uani 1 1 d . . .

H5A H 0.7585 0.1376 0.6294 0.123 Uiso 1 1 calc R . .

H5B H 0.6536 0.1254 0.7105 0.123 Uiso 1 1 calc R . .

H5C H 0.6508 0.1774 0.6665 0.123 Uiso 1 1 calc R . .

C6 C 0.5894(6) 0.0641(2) 0.5548(5) 0.088(3) Uani 1 1 d . . .

H6A H 0.6901 0.0653 0.5353 0.131 Uiso 1 1 calc R . .

H6B H 0.5299 0.0498 0.5079 0.131 Uiso 1 1 calc R . .

H6C H 0.5826 0.0447 0.6088 0.131 Uiso 1 1 calc R . .

C7 C 0.3642(7) -0.0053(2) 0.7989(3) 0.070(2) Uani 1 1 d D . .

C8 C 0.5220(7) 0.0116(3) 0.8144(5) 0.116(3) Uani 1 1 d D . .

H8A H 0.5860 -0.0162 0.8172 0.175 Uiso 1 1 calc R . .

H8B H 0.5281 0.0294 0.8704 0.175 Uiso 1 1 calc R . .

H8C H 0.5515 0.0324 0.7652 0.175 Uiso 1 1 calc R . .

C9 C 0.3283(9) -0.0396(2) 0.8737(4) 0.107(3) Uani 1 1 d D . .

H9A H 0.3961 -0.0665 0.8728 0.161 Uiso 1 1 calc R . .

H9B H 0.2298 -0.0516 0.8658 0.161 Uiso 1 1 calc R . .

H9C H 0.3360 -0.0230 0.9308 0.161 Uiso 1 1 calc R . .

C10 C 0.3555(11) -0.0321(2) 0.7116(4) 0.134(4) Uani 1 1 d D . .

H10A H 0.4193 -0.0599 0.7140 0.202 Uiso 1 1 calc R . .

H10B H 0.3856 -0.0110 0.6631 0.202 Uiso 1 1 calc R . .

H10C H 0.2561 -0.0426 0.7013 0.202 Uiso 1 1 calc R . .

C11 C 0.0409(6) 0.0326(2) 0.7950(3) 0.084(2) Uani 1 1 d D . .

C12 C -0.0195(7) 0.0210(3) 0.8868(4) 0.131(3) Uani 1 1 d D . .

H12A H -0.1215 0.0123 0.8813 0.196 Uiso 1 1 calc R . .

H12B H -0.0101 0.0491 0.9253 0.196 Uiso 1 1 calc R . .

H12C H 0.0343 -0.0057 0.9127 0.196 Uiso 1 1 calc R . .

C13 C 0.0163(9) -0.0137(3) 0.7386(5) 0.153(4) Uani 1 1 d D . .

H13A H -0.0860 -0.0224 0.7399 0.229 Uiso 1 1 calc R . .

H13B H 0.0739 -0.0398 0.7635 0.229 Uiso 1 1 calc R . .

H13C H 0.0456 -0.0078 0.6770 0.229 Uiso 1 1 calc R . .

C14 C -0.0517(7) 0.0688(3) 0.7517(5) 0.163(4) Uani 1 1 d D . .

H14A H -0.1525 0.0583 0.7537 0.245 Uiso 1 1 calc R . .

H14B H -0.0223 0.0727 0.6896 0.245 Uiso 1 1 calc R . .

H14C H -0.0418 0.0993 0.7829 0.245 Uiso 1 1 calc R . .

C15 C 0.2880(6) 0.0947(2) 0.8848(3) 0.0650(19) Uani 1 1 d D . .

C16 C 0.1690(9) 0.1339(2) 0.8901(5) 0.135(4) Uani 1 1 d D . .

H16A H 0.1938 0.1567 0.9371 0.203 Uiso 1 1 calc R . .

H16B H 0.0761 0.1189 0.9035 0.203 Uiso 1 1 calc R . .

H16C H 0.1625 0.1506 0.8330 0.203 Uiso 1 1 calc R . .

C17 C 0.4211(7) 0.1230(3) 0.8584(5) 0.119(3) Uani 1 1 d D . .

H17A H 0.4463 0.1453 0.9061 0.179 Uiso 1 1 calc R . .

H17B H 0.4011 0.1408 0.8037 0.179 Uiso 1 1 calc R . .

H17C H 0.5018 0.1010 0.8485 0.179 Uiso 1 1 calc R . .

C18 C 0.3029(8) 0.0735(2) 0.9760(3) 0.085(2) Uani 1 1 d D . .

H18A H 0.3290 0.0986 1.0184 0.127 Uiso 1 1 calc R . .

H18B H 0.3783 0.0490 0.9755 0.127 Uiso 1 1 calc R . .

H18C H 0.2111 0.0591 0.9936 0.127 Uiso 1 1 calc R . .

C19 C 0.0165(5) 0.26766(17) 0.6594(3) 0.0429(15) Uani 1 1 d D . .

C20 C -0.0339(7) 0.2338(3) 0.7317(4) 0.112(3) Uani 1 1 d D . .

H20A H -0.1375 0.2382 0.7416 0.168 Uiso 1 1 calc R . .

H20B H 0.0188 0.2404 0.7869 0.168 Uiso 1 1 calc R . .

H20C H -0.0157 0.2008 0.7133 0.168 Uiso 1 1 calc R . .

C21 C -0.0718(6) 0.2539(3) 0.5776(4) 0.088(3) Uani 1 1 d D . .

H21A H -0.1745 0.2587 0.5898 0.132 Uiso 1 1 calc R . .

H21B H -0.0544 0.2203 0.5631 0.132 Uiso 1 1 calc R . .

H21C H -0.0433 0.2740 0.5272 0.132 Uiso 1 1 calc R . .

C22 C -0.0250(7) 0.3181(2) 0.6847(5) 0.104(3) Uani 1 1 d D . .

H22A H -0.1295 0.3198 0.6937 0.156 Uiso 1 1 calc R . .

H22B H 0.0027 0.3400 0.6369 0.156 Uiso 1 1 calc R . .

H22C H 0.0248 0.3271 0.7397 0.156 Uiso 1 1 calc R . .

C23 C 0.2759(5) 0.28448(18) 0.5267(3) 0.0519(17) Uani 1 1 d D . .

C24 C 0.2129(8) 0.2534(3) 0.4525(3) 0.116(3) Uani 1 1 d D . .

H24A H 0.2413 0.2664 0.3947 0.174 Uiso 1 1 calc R . .

H24B H 0.1075 0.2532 0.4569 0.174 Uiso 1 1 calc R . .

H24C H 0.2496 0.2208 0.4585 0.174 Uiso 1 1 calc R . .

C25 C 0.2337(9) 0.3361(2) 0.5114(4) 0.104(3) Uani 1 1 d D . .

H25A H 0.2658 0.3462 0.4523 0.155 Uiso 1 1 calc R . .

H25B H 0.2794 0.3562 0.5567 0.155 Uiso 1 1 calc R . .

H25C H 0.1287 0.3393 0.5153 0.155 Uiso 1 1 calc R . .

C26 C 0.4384(6) 0.2814(3) 0.5160(5) 0.105(3) Uani 1 1 d D . .

H26A H 0.4657 0.2944 0.4580 0.157 Uiso 1 1 calc R . .

H26B H 0.4687 0.2479 0.5199 0.157 Uiso 1 1 calc R . .

H26C H 0.4856 0.2998 0.5633 0.157 Uiso 1 1 calc R . .

C27 C 0.3359(5) 0.28389(17) 0.7344(3) 0.0452(16) Uani 1 1 d D . .

C28 C 0.3430(8) 0.33836(19) 0.7362(4) 0.093(2) Uani 1 1 d D . .

H28A H 0.4044 0.3487 0.7857 0.139 Uiso 1 1 calc R . .

H28B H 0.2458 0.3514 0.7438 0.139 Uiso 1 1 calc R . .

H28C H 0.3835 0.3500 0.6801 0.139 Uiso 1 1 calc R . .

C29 C 0.4884(6) 0.2638(3) 0.7290(5) 0.111(3) Uani 1 1 d D . .

H29A H 0.5468 0.2768 0.7778 0.167 Uiso 1 1 calc R . .

H29B H 0.5315 0.2729 0.6721 0.167 Uiso 1 1 calc R . .

H29C H 0.4850 0.2290 0.7336 0.167 Uiso 1 1 calc R . .

C30 C 0.2794(7) 0.2670(2) 0.8237(3) 0.080(2) Uani 1 1 d D . .

H30A H 0.3406 0.2797 0.8714 0.120 Uiso 1 1 calc R . .

H30B H 0.2809 0.2320 0.8257 0.120 Uiso 1 1 calc R . .

H30C H 0.1803 0.2783 0.8316 0.120 Uiso 1 1 calc R . .

 

loop_

 _atom_site_aniso_label

 _atom_site_aniso_U_11

 _atom_site_aniso_U_22

 _atom_site_aniso_U_33

 _atom_site_aniso_U_23

 _atom_site_aniso_U_13

 _atom_site_aniso_U_12

Mo1 0.0208(2) 0.0285(2) 0.0248(2) 0.00315(19) -0.00144(16) -0.0023(2)

P1 0.0320(7) 0.0463(9) 0.0274(7) -0.0016(6) -0.0032(6) 0.0001(7)

P2 0.0273(7) 0.0369(8) 0.0452(8) 0.0027(6) 0.0026(6) 0.0015(6)

Si1 0.0363(8) 0.0327(8) 0.0303(7) 0.0073(6) -0.0074(6) -0.0083(7)

Si2 0.0346(8) 0.0308(8) 0.0271(7) 0.0006(6) -0.0033(6) 0.0016(7)

O1 0.046(2) 0.042(2) 0.0427(19) 0.0178(17) -0.0009(16) -0.0035(18)

O2 0.048(2) 0.031(2) 0.046(2) -0.0021(16) -0.0015(17) 0.0054(17)

C1 0.105(5) 0.055(4) 0.073(4) -0.031(3) -0.047(4) 0.015(4)

C2 0.043(3) 0.084(4) 0.054(3) -0.021(3) -0.023(3) 0.016(3)

C3 0.086(5) 0.164(7) 0.026(3) 0.004(4) -0.005(3) -0.038(5)

C4 0.045(4) 0.170(7) 0.094(5) 0.074(5) 0.034(3) 0.022(4)

C5 0.030(3) 0.127(6) 0.090(5) -0.039(4) -0.001(3) 0.003(4)

C6 0.037(3) 0.055(4) 0.170(7) -0.025(4) 0.009(4) 0.006(3)

C7 0.106(5) 0.051(4) 0.052(4) 0.012(3) 0.012(4) -0.009(4)

C8 0.076(5) 0.137(7) 0.136(7) 0.017(6) -0.005(5) 0.034(5)

C9 0.176(8) 0.056(4) 0.090(5) 0.029(4) -0.011(5) 0.028(5)

C10 0.274(11) 0.054(5) 0.076(5) 0.000(4) 0.047(6) 0.028(6)

C11 0.050(4) 0.161(7) 0.040(3) 0.021(4) -0.011(3) -0.037(4)

C12 0.062(4) 0.261(10) 0.068(4) 0.065(5) 0.003(4) -0.066(6)

C13 0.119(6) 0.246(10) 0.092(6) -0.018(6) -0.023(5) -0.112(7)

C14 0.035(4) 0.317(12) 0.138(6) 0.135(7) -0.001(4) 0.018(6)

C15 0.061(4) 0.082(5) 0.052(4) -0.014(3) 0.003(3) -0.027(4)

C16 0.247(10) 0.058(5) 0.102(6) -0.009(4) 0.067(6) 0.034(6)

C17 0.122(6) 0.148(7) 0.087(5) -0.029(5) 0.001(5) -0.085(5)

C18 0.105(5) 0.099(5) 0.049(4) -0.018(4) -0.020(4) 0.000(5)

C19 0.044(3) 0.051(3) 0.033(3) -0.003(3) 0.004(2) 0.001(3)

C20 0.052(4) 0.202(8) 0.082(5) 0.061(5) 0.012(4) -0.011(5)

C21 0.035(3) 0.135(6) 0.094(5) -0.025(5) -0.015(3) 0.000(4)

C22 0.062(4) 0.084(5) 0.167(7) -0.046(5) 0.007(5) 0.026(4)

C23 0.052(3) 0.062(4) 0.042(3) 0.009(3) 0.006(3) -0.016(3)

C24 0.161(7) 0.166(7) 0.022(3) -0.008(4) 0.007(4) -0.092(6)

C25 0.161(7) 0.077(5) 0.073(4) 0.048(4) 0.013(5) 0.000(5)

C26 0.085(5) 0.149(7) 0.082(5) 0.021(5) 0.042(4) -0.008(5)

C27 0.052(3) 0.048(3) 0.035(3) -0.004(3) -0.019(3) 0.004(3)

C28 0.140(6) 0.050(4) 0.089(5) -0.010(4) -0.067(4) -0.007(4)

C29 0.052(4) 0.160(8) 0.120(6) -0.042(6) -0.035(4) 0.018(5)

C30 0.116(5) 0.078(5) 0.046(4) -0.003(3) -0.030(4) -0.011(4)

 

_geom_special_details

;

 All esds (except the esd in the dihedral angle between two l.s. planes)

 are estimated using the full covariance matrix.  The cell esds are taken

 into account individually in the estimation of esds in distances, angles

 and torsion angles; correlations between esds in cell parameters are only

 used when they are defined by crystal symmetry.  An approximate (isotropic)

 treatment of cell esds is used for estimating esds involving l.s. planes.

;

 

loop_

 _geom_bond_atom_site_label_1

 _geom_bond_atom_site_label_2

 _geom_bond_distance

 _geom_bond_site_symmetry_2

 _geom_bond_publ_flag

Mo1 O2 1.943(3) . ?

Mo1 O1 1.975(3) . ?

Mo1 P2 2.3330(13) . ?

Mo1 P1 2.3374(13) . ?

P1 C1 1.802(6) . ?

P1 C2 1.810(5) . ?

P1 C3 1.816(5) . ?

P2 C5 1.798(6) . ?

P2 C6 1.802(6) . ?

P2 C4 1.809(6) . ?

Si1 O1 1.612(3) . ?

Si1 C11 1.899(6) . ?

Si1 C15 1.909(6) . ?

Si1 C7 1.946(6) . ?

Si2 O2 1.619(3) . ?

Si2 C23 1.912(5) . ?

Si2 C27 1.921(5) . ?

Si2 C19 1.926(5) . ?

C7 C10 1.514(7) . ?

C7 C9 1.518(7) . ?

C7 C8 1.555(8) . ?

C11 C14 1.479(8) . ?

C11 C12 1.528(7) . ?

C11 C13 1.565(8) . ?

C15 C18 1.500(7) . ?

C15 C17 1.521(8) . ?

C15 C16 1.559(8) . ?

C19 C22 1.514(7) . ?

C19 C20 1.520(7) . ?

C19 C21 1.525(7) . ?

C23 C26 1.518(7) . ?

C23 C25 1.515(7) . ?

C23 C24 1.528(7) . ?

C27 C29 1.524(7) . ?

C27 C30 1.520(7) . ?

C27 C28 1.528(7) . ?

 

loop_

 _geom_angle_atom_site_label_1

 _geom_angle_atom_site_label_2

 _geom_angle_atom_site_label_3

 _geom_angle

 _geom_angle_site_symmetry_1

 _geom_angle_site_symmetry_3

 _geom_angle_publ_flag

O2 Mo1 O1 136.67(13) . . ?

O2 Mo1 P2 110.14(10) . . ?

O1 Mo1 P2 99.62(10) . . ?

O2 Mo1 P1 111.74(10) . . ?

O1 Mo1 P1 96.85(10) . . ?

P2 Mo1 P1 93.10(5) . . ?

C1 P1 C2 100.9(3) . . ?

C1 P1 C3 100.5(3) . . ?

C2 P1 C3 99.4(3) . . ?

C1 P1 Mo1 114.0(2) . . ?

C2 P1 Mo1 114.89(18) . . ?

C3 P1 Mo1 123.8(2) . . ?

C5 P2 C6 100.3(3) . . ?

C5 P2 C4 99.3(3) . . ?

C6 P2 C4 99.3(3) . . ?

C5 P2 Mo1 114.8(2) . . ?

C6 P2 Mo1 118.8(2) . . ?

C4 P2 Mo1 120.6(2) . . ?

O1 Si1 C11 107.6(2) . . ?

O1 Si1 C15 106.8(2) . . ?

C11 Si1 C15 112.9(2) . . ?

O1 Si1 C7 107.2(2) . . ?

C11 Si1 C7 111.6(3) . . ?

C15 Si1 C7 110.4(2) . . ?

O2 Si2 C23 108.1(2) . . ?

O2 Si2 C27 106.62(19) . . ?

C23 Si2 C27 111.7(2) . . ?

O2 Si2 C19 106.4(2) . . ?

C23 Si2 C19 111.3(2) . . ?

C27 Si2 C19 112.4(2) . . ?

Si1 O1 Mo1 152.2(2) . . ?

Si2 O2 Mo1 175.1(2) . . ?

C10 C7 C9 108.5(5) . . ?

C10 C7 C8 109.1(6) . . ?

C9 C7 C8 106.9(6) . . ?

C10 C7 Si1 109.2(4) . . ?

C9 C7 Si1 113.9(4) . . ?

C8 C7 Si1 109.0(4) . . ?

C14 C11 C12 109.2(6) . . ?

C14 C11 C13 104.2(5) . . ?

C12 C11 C13 105.2(6) . . ?

C14 C11 Si1 111.9(4) . . ?

C12 C11 Si1 115.1(4) . . ?

C13 C11 Si1 110.3(4) . . ?

C18 C15 C17 111.9(5) . . ?

C18 C15 C16 107.1(5) . . ?

C17 C15 C16 102.8(5) . . ?

C18 C15 Si1 115.0(4) . . ?

C17 C15 Si1 110.1(4) . . ?

C16 C15 Si1 109.2(4) . . ?

C22 C19 C20 108.9(5) . . ?

C22 C19 C21 107.6(5) . . ?

C20 C19 C21 104.7(5) . . ?

C22 C19 Si2 114.1(4) . . ?

C20 C19 Si2 109.8(4) . . ?

C21 C19 Si2 111.2(3) . . ?

C26 C23 C25 107.1(5) . . ?

C26 C23 C24 105.5(5) . . ?

C25 C23 C24 109.6(5) . . ?

C26 C23 Si2 110.3(4) . . ?

C25 C23 Si2 114.9(4) . . ?

C24 C23 Si2 109.2(4) . . ?

C29 C27 C30 104.8(5) . . ?

C29 C27 C28 109.2(5) . . ?

C30 C27 C28 108.1(5) . . ?

C29 C27 Si2 110.1(4) . . ?

C30 C27 Si2 110.6(4) . . ?

C28 C27 Si2 113.6(4) . . ?

 

_diffrn_measured_fraction_theta_max    0.992

_diffrn_reflns_theta_full              20.81

_diffrn_measured_fraction_theta_full   0.992

_refine_diff_density_max    0.697

_refine_diff_density_min   -0.458

_refine_diff_density_rms    0.076


#===end
